# Supplementary material for: How health service delivery guides the allocation of major trauma patients in the intensive care units of the inclusive (hub and spoke) trauma system of the Emilia Romagna Region (Italy). A cross-sectional study
Source: PubMed Central journal article supplement — BMJ Open. 2017 Sep 29;7(9):e016415. doi: 10.1136/bmjopen-2017-016415 (PMC5640142; doi:10.1136/bmjopen-2017-016415), 2017-09-29
Supplement: bmjopen-2017-016415.draft_revisions.pdf [file bmjopen-2017-016415.draft_revisions.pdf]

# BMJ Open

BMJ Open is committed to open peer review. As part of this commitment we make the peer review history of every article we publish publicly available.

When an article is published we post the peer reviewers' comments and the authors' responses online. We also post the versions of the paper that were used during peer review. These are the versions that the peer review comments apply to.

The versions of the paper that follow are the versions that were submitted during the peer review process. They are not the versions of record or the final published versions. They should not be cited or distributed as the published version of this manuscript.

BMJ Open is an open access journal and the full, final, typeset and author-corrected version of record of the manuscript is available on our site with no access controls, subscription charges or pay-per-view fees (<http://bmjopen.bmj.com>).

If you have any questions on BMJ Open's open peer review process please email [info.bmjopen@bmj.com](mailto:info.bmjopen@bmj.com)

# BMJ Open

## How health service delivery guides the allocation of major trauma patients in intensive care units of the inclusive (Hub & Spoke) trauma system of the Emilia Romagna Region (Italy): a cross sectional study

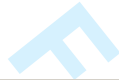

|                                 |                                                                                                                                                                                                                                                                                                                                                                                                                                                                                                                                                                                                                                                                                                                                        |
|---------------------------------|----------------------------------------------------------------------------------------------------------------------------------------------------------------------------------------------------------------------------------------------------------------------------------------------------------------------------------------------------------------------------------------------------------------------------------------------------------------------------------------------------------------------------------------------------------------------------------------------------------------------------------------------------------------------------------------------------------------------------------------|
| Journal:                        | <i>BMJ Open</i>                                                                                                                                                                                                                                                                                                                                                                                                                                                                                                                                                                                                                                                                                                                        |
| Manuscript ID                   | bmjopen-2017-016415                                                                                                                                                                                                                                                                                                                                                                                                                                                                                                                                                                                                                                                                                                                    |
| Article Type:                   | Research                                                                                                                                                                                                                                                                                                                                                                                                                                                                                                                                                                                                                                                                                                                               |
| Date Submitted by the Author:   | 02-Mar-2017                                                                                                                                                                                                                                                                                                                                                                                                                                                                                                                                                                                                                                                                                                                            |
| Complete List of Authors:       | Chieregato, Arturo; ASST Grande Ospedale Metropolitano Niguarda, Neuroranimazione<br>Volpi, Annalisa<br>Gordini, Giovanni; Maggiore Hospital Trauma Center, Trauma ICU<br>Ventura, Chiara; Regional Agency for Health and Social Care of Emilia-Romagna,<br>Barozzi, Marco<br>Caspani, Maria Luisa Rita<br>Fabbri, Andrea<br>Ferrari, Anna Maria<br>Ferri, Enrico<br>Giugni, Aimone<br>Marino, Massimiliano; Regional Agency for Health and Social Care of Emilia-Romagna,<br>Martino, Costanza<br>Pizzamiglio, Mario<br>Ravaldini, Maurizio<br>Russo, Emanuele; AUSL Cesena, UO Anestesia e Rianimazione<br>Trabucco, Laura<br>Trombetti, Susanna<br>De Palma, Rossana; Regional Agency for Health and Social Care of Emilia-Romagna, |
| <b>Primary Subject Heading</b>: | Emergency medicine                                                                                                                                                                                                                                                                                                                                                                                                                                                                                                                                                                                                                                                                                                                     |
| Secondary Subject Heading:      | Public health                                                                                                                                                                                                                                                                                                                                                                                                                                                                                                                                                                                                                                                                                                                          |
| Keywords:                       | Health policy < HEALTH SERVICES ADMINISTRATION & MANAGEMENT, Neurosurgery < SURGERY, traumatic brain injury, trauma center, trauma system                                                                                                                                                                                                                                                                                                                                                                                                                                                                                                                                                                                              |
|                                 |                                                                                                                                                                                                                                                                                                                                                                                                                                                                                                                                                                                                                                                                                                                                        |

SCHOLARONE™  
Manuscripts

1  
2  
3  
4  
5  
6  
7  
8  
9  
10  
11  
12  
13  
14  
15  
16  
17  
18  
19  
20  
21  
22  
23  
24  
25  
26  
27  
28  
29  
30  
31  
32  
33  
34  
35  
36  
37  
38  
39  
40  
41  
42  
43  
44  
45  
46  
47  
48  
49  
50  
51  
52  
53  
54  
55  
56  
57  
58  
59  
60

## How health service delivery guides the allocation of major trauma patients in intensive care units of the inclusive (Hub & Spoke) trauma system of the Emilia Romagna Region (Italy): a cross sectional study

**Authors:** Arturo Chierogato<sup>1</sup>, Annalisa Volpi<sup>2</sup>, Giovanni Gordini<sup>3</sup>, Chiara Ventura<sup>4</sup>, Marco Barozzi<sup>5</sup>, Maria Luisa Rita Caspani<sup>2</sup>, Andrea Fabbri<sup>6</sup>, Anna Maria Ferrari<sup>7</sup>, Enrico Ferri<sup>8</sup>, Aimone Giugni<sup>3</sup>, Massimiliano Marino<sup>4</sup>, Costanza Martino<sup>9</sup>, Mario Pizzamiglio<sup>10</sup>, Maurizio Ravaldini<sup>9</sup>, Emanuele Russo<sup>9</sup>, Laura Trabucco<sup>7</sup>, Susanna Trombetti<sup>4</sup>, Rossana De Palma<sup>4</sup>

### Affiliations:

Arturo Chierogato<sup>1</sup>, [arturo.chierogato@gmail.com](mailto:arturo.chierogato@gmail.com), Neuroranimazione, ASST Grande Ospedale Metropolitano Niguarda, Milano

Annalisa Volpi<sup>2</sup>, [avolpi@ao.pr.it](mailto:avolpi@ao.pr.it), Anestesia e Rianimazione, Azienda Ospedaliero-Universitaria di Parma

Giovanni Gordini<sup>3</sup>, [G.Gordini@118er.it](mailto:G.Gordini@118er.it), Rianimazione-118, Azienda USL di Bologna

Chiara Ventura<sup>4</sup>, [CVentura@Regione.Emilia-Romagna.it](mailto:CVentura@Regione.Emilia-Romagna.it), Area Governo Clinico Agenzia Sanitaria e Sociale Regione Emilia Romagna, Bologna

Marco Barozzi<sup>5</sup>, [marco.barozzi@auslromagna.it](mailto:marco.barozzi@auslromagna.it), Pronto Soccorso e Medicina d'Urgenza, Ospedale di Cesena, Azienda USL della Romagna

Maria Luisa Rita Caspani<sup>2</sup>, [mcaspani@ao.pr.it](mailto:mcaspani@ao.pr.it), Anestesia e Rianimazione, Azienda Ospedaliero-Universitaria di Parma

Andrea Fabbri<sup>6</sup>, [andrea.fabbri@auslromagna.it](mailto:andrea.fabbri@auslromagna.it), Pronto Soccorso e Medicina d'Urgenza, Ospedale di Forlì, Azienda AUSL di Romagna

Anna Maria Ferrari<sup>7</sup>, [annamaria.ferrari@asmn.re.it](mailto:annamaria.ferrari@asmn.re.it), Pronto Soccorso e Medicina d'Urgenza, Azienda Ospedaliera Arcispedale Santa Maria Nuova - IRCCS

Enrico Ferri<sup>8</sup>, [ferrienicola@gmail.com](mailto:ferrienicola@gmail.com), Anestesia e Rianimazione, Azienda Ospedaliero-Universitaria di Ferrara

Aimone Giugni<sup>3</sup>, [aimonegiugni@gmail.com](mailto:aimonegiugni@gmail.com), Anestesia e Rianimazione, Azienda Ospedaliero-Universitaria di Parma

Massimiliano Marino<sup>4</sup>, [mmarino@Regione.Emilia-Romagna.it](mailto:mmarino@Regione.Emilia-Romagna.it), Area Governo clinico dell'Agenzia Sanitaria Regionale, Regione Emilia Romagna, Bologna

Costanza Martino<sup>9</sup>, [costanza.martino@auslromagna.it](mailto:costanza.martino@auslromagna.it), Anestesia e Rianimazione, Ospedale di Cesena, AUSL di Romagna

Mario Pizzamiglio<sup>10</sup>, [mpizzamiglio@libero.it](mailto:mpizzamiglio@libero.it), Anestesia e Rianimazione, Azienda USL di Piacenza

1  
2 Maurizio Ravaldini<sup>9</sup>, [maurizio.ravaldini@auslromagna.it](mailto:maurizio.ravaldini@auslromagna.it), Anestesia e Rianimazione, Ospedale di  
3 Cesena, AUSL della Romagna  
4

5 Emanuele Russo<sup>9</sup>, [lelegaiola@gmail.com](mailto:lelegaiola@gmail.com), Anestesia e Rianimazione, Ospedale di Cesena, AUSL  
6 della Romagna  
7

8 Laura Trabucco<sup>7</sup>, [laura.trabucco@asmn.re.it](mailto:laura.trabucco@asmn.re.it), Pronto Soccorso e Medicina d'Urgenza, Azienda  
9 Ospedaliera Arcispedale Santa Maria Nuova - IRCCS  
10

11 Susanna Trombetti<sup>4</sup>, [susanna.trombetti@gmail.com](mailto:susanna.trombetti@gmail.com), Area Governo clinico dell'Agenda Sanitaria  
12 Regionale, Regione Emilia Romagna, Bologna  
13

14 Rossana De Palma<sup>4</sup>, [RDePalma@Regione.Emilia-Romagna.it](mailto:RDePalma@Regione.Emilia-Romagna.it), Area Governo clinico dell'Agenda  
15 Sanitaria Regionale, Regione Emilia Romagna, Bologna  
16  
17

### 18 19 20 **Corresponding author**

21 Dr. Arturo Chierigato,

22  
23 Neuroranimazione, Dipartimento di Neuroscienze e Dipartimento di Anestesia,

24 ASST Grande Ospedale Metropolitano Niguarda, Piazza Ospedale Maggiore, Milano, Italy

25  
26 Telephone and Telefax numbers: +39 349 4664603 (mobile);

27  
28 E-mail: [arturo.chierigato@gmail.com](mailto:arturo.chierigato@gmail.com)  
29  
30  
31  
32  
33  
34  
35  
36  
37

### 38 **Abstract**

39  
40 Objective: to evaluate the cross sectional patient distribution in the intensive care units of the  
41 inclusive hub and spoke trauma systems of the Emilia Romagna Region, Italy  
42

43 Setting: Intensive care units of Trauma System of the Emilia-Romagna, an Italian region with about  
44 4.5 million inhabitants.  
45

46 Participants: The case material consisted of 5,300 patients with an Injury Severity Score >15,  
47 admitted in the regional intensive care units, and recorded in the Regional Severe Trauma Registry  
48 between 2007 and 2012. Patients excluded was those never admitted to an intensive care unit or  
49 with an Injury Severity Score <15. Severity and typology were classified by the Abbreviated Injury  
50 Score in patients with relevant a) traumatic brain, b) multiple injuries, c) extracranial lesions. The  
51 trauma systems were divided by those including at least one neurosurgical Level II trauma center  
52 (TC) toward those having a neurosurgical service only inside the Level I TC.  
53  
54  
55  
56  
57  
58  
59  
60

1  
2 Results: More than half (2988/5287, 56.5%) were admitted to Level I TC but 32.2% (1702/5287)  
3 were admitted to Level II neurosurgical TC.  
4

5 The rate (in respect of all the trauma patients of the SIAT) of patients admitted to the Level I TC  
6 head of a SIAT without further neurosurgical facilities (1083/1472, 73.6%) was higher than in the  
7 Level I TCs head of the Trauma Systems including further neurosurgical Level II TC (1905/3815;  
8 49.9%). In the Trauma Systems with level II neurosurgical TC the fraction of patients admitted to  
9 level I TCs (1905/3815; 49.9%) was similar to those admitted to the level II neurosurgical TC  
10 (1702/3815, 44.6%).  
11

12 Conclusion: The concept of Hub and Spoke system was fully applied only in the Trauma System  
13 where the neurosurgical facilities was an exclusive finding of the Level I TC. This study suggests  
14 that the regional density of neurosurgical centers must be considered before implementing Trauma  
15 Systems.  
16  
17

#### 18 **Article summary. Strengths and limitations of this study**

19 Patient centralization is *per se* largely driven by the availability of neurosurgical facilities.  
20

21 The construction of a hub-and-spoke system in a public health system involves limiting the number  
22 of neurosurgical centers ready for traumatic emergencies governance.  
23

24 The study results are limited by the inclusion of only the patients admitted to an intensive care unit  
25  
26

27 Abstract words count 300  
28

29 Manuscript words count 2112  
30  
31  
32  
33  
34  
35  
36

#### 37 **Background**

38 Trauma is a major issue for society and a challenge for health policy makers. In Italy it is chiefly  
39 associated with road accidents (ISTAT, ETSC). [1-4] Regionalized trauma systems have been  
40 designed in many countries to provide a coordinated, organized response to injury- [5] By  
41 concentrating patients in a few Level I trauma centers (TC) to ensure prompt, specialized care  
42 should improve patient outcomes.[6] Health authorities in several countries have used guidelines to  
43 designate hospitals as level I through IV TCs.[6] There is a general consensus that Level I TCs  
44 should admit at least 200 patients with major trauma per year.[5,7]  
45

46 Currently most regional trauma systems in the United States are based on the “exclusive” design.  
47 However this precludes the participation of non-TC acute care facilities in the treatment of less  
48 severe trauma patients and thereafter the expertise of non TCs could fall below critical levels.  
49  
50  
51  
52  
53  
54  
55  
56  
57  
58  
59  
60

1  
2 By contrast, in Europe, which is more urbanized and has a higher density of hospitals, an  
3 “inclusive” model is more frequently adopted, encompassing non-TC hospitals (spoke centers)  
4 caring chiefly for less severe trauma.[8] In this system, Level 1 TCs (hubs) are central to trauma  
5 system organization.[8] They directly admit the patients who are most severe at the scene and  
6 indirectly receive those who are too severe at first admission or who deteriorate after admission to  
7 spoke centers.  
8  
9

10  
11 In 2002, the regional health service of Emilia Romagna, in the north of Italy, designed three trauma  
12 systems, headed by three Level I TCs, based on geographic location, previous organization history,  
13 and presence of clinical expertise (DGR 1267/2002).[9] Each trauma system is named “Sistema  
14 Integrato Assistenza Traumi (SIAT, Integrated System for Trauma Patient Care)”, each of which  
15 represents a separate, specific Trauma System. In two of these Trauma Systems, in addition to level  
16 I TC, were also concomitantly present level II TCs neurosurgical centers. Considering the relevance  
17 of TBI on trauma patients there could be that these latter centers centralize patients otherwise  
18 potentially deputy for level I TC.  
19  
20

21 The aim of this study was to describe, ten years after the establishment of the Regione Emilia  
22 Romagna Trauma System, the access of patients with major trauma to the intensive care units  
23 (ICUs) in the different Trauma System and how the availability of neurosurgical facilities could had  
24 influenced this process.  
25  
26

## 27 **Material and Methods**

28 Setting: Emilia-Romagna is an Italian region with about 4.5 million inhabitants. (Figure 1 and  
29 online supplement appendix table 1).[10] The “inclusive” model of trauma care included  
30 community or teaching hospitals not dedicated exclusively to trauma. All were connected by a  
31 dedicated Emergency Medical Service, including a helicopter. The characteristics of Trauma Center  
32 are described in the Appendix (Appendix Table 2).[6] The underlying philosophy of the inclusive  
33 hub and spoke trauma system is that Level I TCs function as hubs within highly specialized  
34 hospitals and other Level II TC facilities serve as “spokes”. Some Level II TCs have neurosurgical  
35 units. The SIATs differ from each other in that one of them has no neurosurgical Level II unit  
36 (Romagna) while the East and West Emilia SIATs have neurosurgical Level II TCs.  
37  
38

39 In summary, the Trauma System is organized according to:  
40  
41

42 a) three subtypes of centre:  
43

- 44 • Level I TCs: Bologna, Parma, Cesena hospitals
- 45 • Level II TCs with neurosurgery: Modena Baggiovara, Ferrara, Reggio Emilia hospitals
- 46 • Level II TCs with no neurosurgery: Rimini, Riccione, Forlì, Ravenna, Faenza, Lugo, Piacenza

47 b) two subtypes of SIAT:  
48  
49  
50  
51  
52  
53  
54  
55  
56  
57  
58  
59  
60

- SIAT with neurosurgical Level II TC;
- SIAT with no neurosurgical Level II TC.

The system embraces the concept of back transferring patients from the hub to the spoke, once they have been stabilized and specialist problems have been solved.[12] The ICU network is further supported by a rehabilitation unit network.[13]

The protocols to describe direct access from the scene to Level I TC and secondary referral from level II TC were designed in each of three Trauma Systems. However, Romagna first implemented the telemedicine for traumatic brain injury since the 1990s.[14-15]

Since 2007, data on the severity of patients admitted to hospitals in the Emilia Romagna region have been prospectively collected by the three TCs and by ten other spoke hospitals in the regional severe trauma registry (Registro Regionale Traumi Gravi, RRTG).[16,17] The system has been regularly monitored by a commission which checks data and implements the system organization.[18]

#### Case material

The cross sectional study was conducted using data from the RRTG. The case material analyzed for the study consisted of consecutive cases collected from 2007 to 2012 (appendix figure 1). The criteria for inclusion in the registry was traumatic injury with an Injury Severity Score (ISS) greater than 15 or admission to an ICU.[19] Consequently a potential bias is that patients not admitted in the regular ward were not considered by the study. Injury severity was coded according to the Abbreviated Injury Score 1990 (AIS) – 1998 update, by a trained coder at each hospital. Training was self-managed by the regional authorities, with no official certification by the Association for the Advancement of Automotive Medicine.[20]

#### Descriptive analysis of patient distribution

Patients can be transferred from one hospital to another within the trauma system but are recorded in the registry only once. The following attribution criteria are applied for registry entries: a) the first admitting hospital, b) the data recorded in the ward providing the most intensive therapy, in the said hospital.

Patients were also classified in three categories by type of anatomical lesion. The objective was to identify patients with relevant extracranial injuries, those with relevant cranial or spinal injuries, and those with both clinically relevant extracranial or cranial/spinal injuries.

We used a priori AIS cutoff of  $<3$  and  $\geq 3$  to classify, respectively, relevant or not clinical lesion.

AIS cranial score  $\geq 3$  was used to classify moderate or severe TBI,[21-24] although this differs from the conventional classification.[26,27]

Accordingly, the patients were classified as follows:



- patients with moderate or severe traumatic brain injury (TBI) or cervical spine injury: with an AIS cranial score value  $\geq 3$  and an AIS extracranial score  $< 3$ .
- patients with severe multiple injuries: with extracranial and cranial lesions both having AIS score  $\geq 3$ .
- patients with extracranial lesions: with at least one extracranial AIS score of  $\geq 3$  and a cranial AIS of  $< 3$ ,

Demographic and clinical characteristics of patients were also described by Abbreviated Injury Score (AIS),<sup>[19]</sup> Glasgow Coma Scale (GCS),<sup>[24]</sup> Injury Severity Score (ISS),<sup>[18]</sup> Comorbidities were assessed by Charlson Score Index.<sup>[26]</sup>

The data were analyzed descriptively. Continuous variables were expressed as mean, standard deviation, median and range. All analyzes are carried out through SAS 8.2 System (SAS Institute, North Carolina). Because of the observational design of the study and the anonymity of the final database, neither patient consent nor approval of ethical committee was necessary.

## Results

After applying the inclusion criteria, 5,300 patients were eligible for the study. However, details on the AIS categories were available for only 5,287 patients.

General and specific characteristics of patients (reported in Table 1).

Table 1: Case material on 5300 patients in the period 2007-2012. Data on type of referral are limited to 5293 patients (missing data on 7 patients concerning type of admission). Comorbidities were assessed by Charlson Score Index<sup>26</sup>. Abbreviated Injury Score (AIS)<sup>19</sup>, Glasgow Coma Scale (GCS)<sup>24</sup>, Injury Severity Score (ISS)<sup>18</sup>, Trauma Center (TC). Traumatic Brain Injury (TBI),

| Variable          | Classification | Trauma System | TC level I (Hub) and direct admission | TC level I (Hub) and secondary referral | Neurosurgical TC level II (Spoke) and direct admission | Neurosurgical TC level II (Spoke) and secondary admission | Non-neurosurgical TC level II (Spoke) |
|-------------------|----------------|---------------|---------------------------------------|-----------------------------------------|--------------------------------------------------------|-----------------------------------------------------------|---------------------------------------|
| No.               |                | 5300          | *2,274 (43-1%)                        | *716 (13.5%)                            | *1,600 (30.2%)                                         | *102 (1.9%)                                               | **600 (11.3%)                         |
| Age, Median (IQR) |                | 46 $\pm$ 38   | 44 $\pm$ 38                           | 48 $\pm$ 39                             | 47 $\pm$ 37                                            | 56,5 $\pm$ 39                                             | 49 $\pm$ 41                           |
| Age, No (%)       | 0-2            | 34 (0.6%)     | 17 (0.7%)                             | 14 (2.0%)                               | 2 (0.1%)                                               | -                                                         | 1 (0.2%)                              |
|                   | 3-8            | 61 (1.2%)     | 35 (1.5%)                             | 14 (2.0%)                               | 7 (0.4%)                                               | -                                                         | 5 (0.8%)                              |
|                   | 9-11           | 33 (0.6%)     | 21 (0.9%)                             | 4 (0.6%)                                | 4 (0.2%)                                               | 1 (1.0%)                                                  | 3 (0.5%)                              |
|                   | 12-14          | 72 (1.4%)     | 34 (1.5%)                             | 9 (1.3%)                                | 20 (1.2%)                                              | 2 (2.0%)                                                  | 7 (1.2%)                              |
|                   | 15-20          | 413 (7.8%)    | 182 (8.0%)                            | 54 (7.5%)                               | 134 (8.4%)                                             | 3 (3.0%)                                                  | 39 (6.5%)                             |



| Variable                                          | Classification | Trauma System | TC level I (Hub) and direct admission | TC level I (Hub) and secondary referral | Neurosurgical TC level II (Spoke) and direct admission | Neurosurgical TC level II (Spoke) and secondary admission | Non-neurosurgical TC level II (Spoke) |
|---------------------------------------------------|----------------|---------------|---------------------------------------|-----------------------------------------|--------------------------------------------------------|-----------------------------------------------------------|---------------------------------------|
|                                                   | 21-30          | 792 (14.9%)   | 363 (16.0%)                           | 91 (12.7%)                              | 238 (14.9%)                                            | 10 (9.8%)                                                 | 90 (15.0%)                            |
|                                                   | 31-40          | 808 (15.2%)   | 358 (15.7%)                           | 96 (13.4%)                              | 253 (15.8%)                                            | 16 (15.7%)                                                | 85 (14.1%)                            |
|                                                   | 41-50          | 791 (14.9%)   | 355 (15.6%)                           | 106 (14.8%)                             | 236 (14.7%)                                            | 11 (10.8%)                                                | 83 (13.8%)                            |
|                                                   | 51-60          | 580 (10.9%)   | 226 (9.9%)                            | 80 (11.2%)                              | 191 (11.9%)                                            | 10 (9.8%)                                                 | 72 (12.0%)                            |
|                                                   | 61-70          | 585 (11.0%)   | 244 (10.7%)                           | 94 (13.1%)                              | 180 (11.2%)                                            | 14 (13.7%)                                                | 53 (8.8%)                             |
|                                                   | 71-80          | 730 (13.8%)   | 295 (13.0%)                           | 108 (15.1%)                             | 200 (12.5%)                                            | 23 (22.6%)                                                | 103 (17.1%)                           |
|                                                   | >80            | 401 (7.6%)    | 147 (6.5%)                            | 46 (6.4%)                               | 136 (8.5%)                                             | 12 (11.8%)                                                | 60 (10.0%)                            |
| Gender , No (%)                                   | male           | 3,905 (73.7%) | 1,720 (75.5%)                         | 512 (71.5%)                             | 1,182 (73.8%)                                          | 68 (66.7%)                                                | 421 (70.1%)                           |
| Type of trauma, No (%)                            | Closed         | 5,160 (97.4%) | 2,222 (97.6%)                         | 695 (97.1%)                             | 1,573 (95.3%)                                          | 100 (98.0%)                                               | 567 (94.3%)                           |
|                                                   | Penetrating    | 113 (2.1%)    | 50 (2.2%)                             | 15 (2.1%)                               | 28 (1.7%)                                              | 2 (2.0%)                                                  | 18 (3.0%)                             |
|                                                   | Missing        | 27 (0.5%)     | 5 (0.2%)                              | 6 (0.8%)                                | -                                                      | -                                                         | 16 (2.7%)                             |
| Mechanism of injury, No (%)                       | Traffic        | 3,517 (66.4%) | 1,561 (68.6%)                         | 370 (51.7%)                             | 1,107 (69.1%)                                          | 50 (49.0%)                                                | 427 (71.1%)                           |
|                                                   | Minor Fall     | 1,112 (21.0%) | 454 (19.9%)                           | 219 (30.6%)                             | 324 (20.2%)                                            | 37 (36.3%)                                                | 77 (12.8%)                            |
|                                                   | Precipitation  | 153 (2.9%)    | 59 (2.6%)                             | 18 (2.5%)                               | 65 (4.1%)                                              | 2 (2.0%)                                                  | 9 (1.5%)                              |
|                                                   | Crush          | 129 (2.4%)    | 54 (2.4%)                             | 15 (2.1%)                               | 34 (2.1%)                                              | 1 (1.0%)                                                  | 25 (4.2%)                             |
|                                                   | Other          | 361 (6.8%)    | 145 (6.4%)                            | 89 (12.4%)                              | 70 (4.4%)                                              | 12 (11.8%)                                                | 45 (7.5%)                             |
|                                                   | Missing        | 28 (0.5%)     | 4 (0.2%)                              | 5 (0.7%)                                | 1 (0.1%)                                               | -                                                         | 18 (3.0%)                             |
| Charlson Comorbidity Index <sup>27</sup> , No (%) | 0              | 4,595 (86.7%) | 2,035 (89.4%)                         | 619 (86.5%)                             | 1,351 (84.4%)                                          | 85 (83.3%)                                                | 502 (85.5%)                           |
|                                                   | 1              | 317 (6.0%)    | 102 (4.5%)                            | 52 (7.3%)                               | 101 (6.3%)                                             | 8 (7.8%)                                                  | 54 (9.0%)                             |

| Variable                                        | Classification                | Trauma System | TC level I (Hub) and direct admission | TC level I (Hub) and secondary referral | Neurosurgical TC level II (Spoke) and direct admission | Neurosurgical TC level II (Spoke) and secondary admission | Non-neurosurgical TC level II (Spoke) |
|-------------------------------------------------|-------------------------------|---------------|---------------------------------------|-----------------------------------------|--------------------------------------------------------|-----------------------------------------------------------|---------------------------------------|
|                                                 | ≥2                            | 388 (7.3%)    | 140 (6.2%)                            | 45 (6.3%)                               | 149 (9.3%)                                             | 9 (8.8%)                                                  | 45 (7.5%)                             |
| ISS, median (IQR)                               |                               | 26 ± 12       | 26 ± 12                               | 25 ± 12                                 | 27 ± 13                                                | 25 ± 11                                                   | 25 ± 14                               |
| TBI, No (%)                                     | AISc≥3                        | 1,298 (24.5%) | 583 (25.6%)                           | 319 (44.6%)                             | 299 (18.7%)                                            | 25 (24.5%)                                                | 70 (11.6%)                            |
| Multiple injury, No (%)                         | AISc≥3 and AISmax≥3           | 1,985 (37.4%) | 911 (40.0%)                           | 230 (32.1%)                             | 650 (40.6%)                                            | 30 (39.4%)                                                | 164 (27.3%)                           |
| Extracranial injury, No (%)                     | AIS max extracranial ≥3       | 2,010 (37.9%) | 780 (34.3%)                           | 165 (23.0%)                             | 651 (40.7%)                                            | 47 (46.1%)                                                | 366 (60.9%)                           |
| Not defined, No (%)                             | AIS missing                   | 7 (0.2%)      | 3 (0.1%)                              | 2 (0.3%)                                | 1 (0.01%)                                              |                                                           | 1(0.2%)                               |
| Pupils reactivity to light at admission, No (%) | Bilaterally reactive          | 4,402 (83.1%) | 1,866 (81.9%)                         | 564 (78.8%)                             | 1,362 (85.1%)                                          | 94 (92.2%)                                                | 514 (85.5%)                           |
|                                                 | One pupil dilated unreactive  | 370 (7.0%)    | 177 (7.8%)                            | 54 (7.5%)                               | 115 (7.2%)                                             | 3 (2.9%)                                                  | 20 (3.3%)                             |
|                                                 | Two pupils dilated unreactive | 238 (4.5%)    | 128 (5.6%)                            | 24 (3.3%)                               | 62 (3.9%)                                              | 3 (2.9%)                                                  | 21 (3.5%)                             |
|                                                 | Missing                       | 290 (5.5%)    | 106 (4.7%)                            | 74 (10.3%)                              | 62 (3.9%)                                              | 2 (2.0%)                                                  | 46 (7.6%)                             |
| Pre-hospital GCS, No (%)                        | 14-15                         | 2,660 (50.2%) | 1,054 (46.3%)                         | 360 (50.3%)                             | 812 (50.7%)                                            | 54 (52.9%)                                                | 379 (63.1%)                           |
|                                                 | 9-13                          | 971 (18.3%)   | 445 (19.5%)                           | 125 (17.5%)                             | 295 (18.4%)                                            | 7 (6.9%)                                                  | 99 (16.5%)                            |
|                                                 | 3-8                           | 1,378 (26.0%) | 725 (31.8%)                           | 163 (22.8%)                             | 394 (24.6%)                                            | 12 (11.8%)                                                | 84 (14.0%)                            |
|                                                 | Missing                       | 291 (5.5%)    | 53 (2.3%)                             | 68 (9.5%)                               | 100 (6.2%)                                             | 29 (28.4%)                                                | 39 (6.5%)                             |
| Pre-hospital GCS, median (IQR)                  |                               | 14 ± 8        | 13 ± 8                                | 14 ± 7                                  | 14 ± 7                                                 | 15 ± 2                                                    | 15 ± 3                                |
| Pre-hospital arterial pressure, No (%)          | 0-50 mmHg                     | 79 (1.5%)     | 37 (1.6%)                             | 6 (0.8%)                                | 29 (1.8%)                                              | 1 (1.0%)                                                  | 6 (1.0%)                              |
|                                                 | 51-70 mmHg                    | 228 (4.3%)    | 131 (5.7%)                            | 16 (2.2%)                               | 58 (3.6%)                                              | 1 (1.0%)                                                  | 22 (3.7%)                             |
|                                                 | 71-90 mmHg                    | 689 (13.0%)   | 339 (14.9%)                           | 58(8.1%)                                | 197 (12.3%)                                            | 6 (5.9%)                                                  | 89 (14.8%)                            |
|                                                 | >90 mmHg                      | 3,780 (71.3%) | 1,639 (72.0%)                         | 502 (70.1%)                             | 1,149 (71.8%)                                          | 59 (57.8%)                                                | 430 (71.6%)                           |
|                                                 | missing                       | 524 (9.9%)    | 131 (5.7%)                            | 134 (18.7)                              | 168 (10.5%)                                            | 35 (34.3%)                                                | 54 (9.0%)                             |

| Variable                                             | Classification | Trauma System | TC level I (Hub) and direct admission | TC level I (Hub) and secondary referral | Neurosurgical TC level II (Spoke) and direct admission | Neurosurgical TC level II (Spoke) and secondary admission | Non-neurosurgical TC level II (Spoke) |
|------------------------------------------------------|----------------|---------------|---------------------------------------|-----------------------------------------|--------------------------------------------------------|-----------------------------------------------------------|---------------------------------------|
|                                                      |                |               |                                       | %)                                      |                                                        |                                                           |                                       |
| Pre-hospital hypoxia (SpO <sub>2</sub> <90%), No (%) |                | 656 (12.4%)   | 267 (11.7%)                           | 45 (6.3%)                               | 250 (15.6%)                                            | 29 (28.4%)                                                | 65 (10.8%)                            |
| 30-day mortality, No (%)                             |                | 825 (15.6%)   | 399 (17.5%)                           | 96 (13.4%)                              | 247 (15.4%)                                            | 13 (12.7%)                                                | 69 (11.5%)                            |

Younger patients were more frequently admitted to Level I TCs and older patients to Level II TCs. Paediatric traumas were chiefly centralized at Level I TCs, particularly patients aged < 15 (91% between 0-2 years, 80% between 3-8, 76% between 9 and 11 years, and 60% aged 12 years and over). A slightly lower number of patients aged over 80 years were treated in Level I TCs (48% in Level I and 52% in Level II TCs).

Patients admitted to Level I TCs appeared less frequently to have comorbidities. A higher percentage of patients with GCS  $\leq$  than 13 were admitted to Level I or neurosurgical Level II TCs.

Patient distribution according to three patterns of AIS values (reported in table 2).

Table 2

Patient distribution by type of SIAT in the period 2007-2012. Patients are described according to three patterns of AIS values. The reported data are restricted to the patients for whom AIS was available (5287 patients, 13 missing patients).

The sum of the percentages reported for all patients admitted to the Regional Trauma System. The percentages calculated in each column are given between square brackets.

Abbreviated Injury Score (AIS)<sup>19</sup>, Injury Severity Score (ISS)<sup>18</sup>, Trauma Center (TC). Traumatic Brain Injury (TBI),

|                                                      |              | Trauma system without neurosurgical TC level II spokes Romagna |                                       |                                    |                  | Trauma system with neurosurgical TC level II spokes Emilia |                                       |                                    |            |             |
|------------------------------------------------------|--------------|----------------------------------------------------------------|---------------------------------------|------------------------------------|------------------|------------------------------------------------------------|---------------------------------------|------------------------------------|------------|-------------|
|                                                      |              | TC level I (Hub)                                               | Not neurosurgical TC level II (Spoke) | Indirect access to the TC level I* | TC level I (Hub) | neurosurgical TC level II (Spoke)                          | Non-neurosurgical TC level II (Spoke) | Indirect access to the TC level I* |            |             |
| Patients with ISS>15 and full details in AIS, No (%) |              | 1,472 (100%)                                                   | 1,083 (73.6%)                         | 389 (26.4%)                        | 393 (36.3%)      | 3,815 (100%)                                               | 1,905 (49.9%)                         | 1,702 (44.6%)                      | 208 (5.4%) | 321 (16.8%) |
| TBI, No                                              | AIS $\geq$ 3 | 435                                                            | 392                                   | 43                                 | 201              | 861                                                        | 510                                   | 324                                | 27         | 118         |

|                             |                                               |                       |                        |                        |             |                         |                        |                        |                      |             |
|-----------------------------|-----------------------------------------------|-----------------------|------------------------|------------------------|-------------|-------------------------|------------------------|------------------------|----------------------|-------------|
| (%)                         |                                               | (29.6%)<br>[100%]     | (26.6%)<br>[90.1%]     | (2.9%)<br>[9.9%]       | (51.3%)     | (22.6%)<br>[100%]       | (13.4%)<br>[59.2%]     | (8.5%)<br>[37.6%]      | (0.7%)<br>[3.1%]     | (23.1%)     |
| Multiple injury, No (%)     | AIS <sub>c</sub> ≥3 and AIS <sub>max</sub> ≥3 | 490 (33.3%)<br>[100%] | 391 (26.6%)<br>[79.8%] | 99 (6.7%)<br>[20.2%]   | 124 (31.7%) | 1,493 (39.1%)<br>[100%] | 750 (19.7%)<br>[50.2%] | 680 (17.8%)<br>[45.5%] | 63 (1.7%)<br>[4.2%]  | 106 (14.1%) |
| Extracranial injury, No (%) | AIS max extracranial ≥3                       | 547 (37.2%)<br>[100%] | 300 (20.4%)<br>[54.8%] | 247 (16.8%)<br>[45.2%] | 68 (26.7%)  | 1,461 (38.3%)<br>[100%] | 645 (16.9%)<br>[44.1%] | 698 (18.3%)<br>[47.8%] | 118 (3.1%)<br>[8.1%] | 97 (15.0%)  |

\*: referred to the Trauma Center

Direct admission to the Level I TC of Cesena (Hub of the Romagna, SIAT without a neurosurgical Level II TC) (1,083/1,472; 73.6%) is higher than Level I TC of Emilia (SIAT with a neurosurgical Level II TC) (1,905/3815; 49.9%). In the SIATs without neurosurgical Level II TC, the latter is associated with a quite similar rate of direct admission to neurosurgical level II TC (1,702/3815, 44.6%).

Indirect admission was more frequent at the Level I TC of Cesena (Hub of the Romagna SIAT, in which no neurosurgical TC level II are included) (393/1083; 36.3% vs 321/ 1905; 16.8% at Level I TCs of Emilia). Roughly half of the patients with isolated TBI were indirectly admitted to the TC of Cesena (201/392; 51.3% vs 118/861; 23.1% at the Level I TCs of Emilia). Almost all indirect admissions to Level I TC of Cesena were referred from the non-neurosurgical Level II TCs in the Romagna SIAT (346/393; 88.0%)(Table 2). Conversely, the Level I TCs in Emilia SIAT indirectly admitted only a few patients from neurosurgical Level II TCs (39/321; 12.1%) (Table 3).

Table 3

Percentage of patients indirectly admitted to the dedicated trauma center by type of referring hospital, in the period 2007-2012.

The percentages calculated in each column are given between square brackets.

The reported data are restricted to the patients for whom AIS was available (5,287 patients, 13

missing patients). Abbreviated Injury Score (AIS)<sup>19</sup>, Injury Severity Score (ISS)<sup>18</sup>, Trauma Center (TC).

Traumatic Brain Injury (TBI),

| Referr ed from | TC level I (Hub) in a SIAT without a neurosurgical TC level II (Spoke) Romagna |                                        |                            |                  |          | TC level I (Hub) in a SIAT with a TC level II (Spoke) Emilia |                                        |                                    |                            |                  |          |
|----------------|--------------------------------------------------------------------------------|----------------------------------------|----------------------------|------------------|----------|--------------------------------------------------------------|----------------------------------------|------------------------------------|----------------------------|------------------|----------|
|                | Tota l                                                                         | Non-neurosu rgical TC level II (Spoke) | Anot her TC level I (Hub ) | Anot her regio n | Miss ing | Tota l                                                       | Non-neurosu rgical TC level II (Spoke) | neurosu rgical TC level II (Spoke) | Anot her TC level I (Hub ) | Anot her regio n | Miss ing |
|                |                                                                                |                                        |                            |                  |          |                                                              |                                        |                                    |                            |                  |          |

| Referr ed from                                                 |                                              | TC level I (Hub) in a SIAT without a neurosurgical TC level II (Spoke) Romagna |                                        |                            |                  |           | TC level I (Hub) in a SIAT with a TC level II (Spoke) Emilia |                                        |                                    |                            |                  |            |
|----------------------------------------------------------------|----------------------------------------------|--------------------------------------------------------------------------------|----------------------------------------|----------------------------|------------------|-----------|--------------------------------------------------------------|----------------------------------------|------------------------------------|----------------------------|------------------|------------|
|                                                                |                                              | Tota l                                                                         | Non-neurosu rgical TC level II (Spoke) | Anot her TC level I (Hub ) | Anot her regio n | Miss ing  | Tota l                                                       | Non-neurosu rgical TC level II (Spoke) | neurosu rgical TC level II (Spoke) | Anot her TC level I (Hub ) | Anot her regio n | Miss ing   |
| Total ISS>15 with secondary admission to trauma center, No (%) |                                              | 393 (100%)                                                                     | 346 (88.0%)                            | 1 (0.3%)                   | 18 (4.6%)        | 28 (7.1%) | 321 (100%)                                                   | 183 (57.0%)                            | 39 (12.1%)                         | 11 (3.4%)                  | 26 (8.1%)        | 62 (19.4%) |
| TBI, No (%)                                                    | AIS <sub>c</sub> ≥3                          | 201 [51.1%]                                                                    | 178 [45.3%]                            | 1 [0.3%]                   | 8 [2.0%]         | 14 [3.6%] | 118 [36.8%]                                                  | 83 [25.9%]                             | 11 [3.4%]                          | 1 [0.3%]                   | 4 [1.2%]         | 19 [5.9%]  |
| Multiple injury, No (%)                                        | AIS <sub>c</sub> ≥3 and AIS <sub>m</sub> x≥3 | 124 [31.6%]                                                                    | 110 [28.0%]                            | 0                          | 5 [1.3%]         | 9 [2.3%]  | 106 [33.0%]                                                  | 63 [19.6%]                             | 15 [4.7%]                          | 6 [1.9%]                   | 7 [2.2%]         | 15 [4.7%]  |
| Extracranial injury, No (%)                                    | AIS max extracranial ≥3                      | 68 [17.3%]                                                                     | 58 [14.8%]                             | 0                          | 5 [1.3%]         | 5 [1.3%]  | 97 [30.2%]                                                   | 37 [11.5%]                             | 13 [4.0%]                          | 4 [1.2%]                   | 15 [4.7%]        | 28 [8.7%]  |

## Discussion

### Main results

The study shows that in Emilia Romagna over half of the patients with major trauma requiring ICU care were admitted to a designated Level I. This witness the adoption of the good scientific practice. Therefore, only 32.2% of the patients have direct access to neurosurgical level II TC.

The latter phenomena is not consistent in the three Trauma System. Even if theoretically the patients with isolated TBI should be admitted to Level I TCs, data has shown that they are intercepted by Level II TCs with neurosurgical facilities, even if these patients tend to be less severe. Furthermore, the percentage of patients with extracranial trauma in these centers is higher than in Level I TCs, but lower than in non-neurosurgical Level II TCs, suggesting a surrogate action of TC level I.

Congruently, in the Trauma System without neurosurgical Level II TCs, the rate of (35.1%) secondary referral to Level I TC for patients with TBI, either isolated or associated with multiple injuries, was substantially higher in respect to (9.5%) occurring in the Trauma Systems including

1  
2 neurosurgical hospital. Otherwise the percentage of centralization in Romagna SIAT (35.1%) was  
3 similar to that in the UK (28.3%).[28]  
4

5 This experience is probably more applicable to Europe than in Canadian or Australian regions,  
6 where population density is much lower, or in studies on regions of the USA, where exclusive  
7 trauma systems are usually headed by Level I TCs. However even in Italy, the results are not easy  
8 to compare with other data as neither the distinction between Level I and II TCs nor hub-and-spoke  
9 hierarchical systems are widespread and data set including AIS evaluation are not available.  
10 However, “the *National guidelines for defining standards of hospital care*” recently published in  
11 Italy advance the need to establish a network of functionally linked hospital facilities based on the  
12 integrated “hub and spoke” network model, which differentiates facilities by level of resource  
13 availability and expertise.[29]  
14

15 Compared to the trauma model originally designed for the Emilia Romagna region, which  
16 envisaged Level II trauma centres as deputy for primary stabilization directly admitted of patients,  
17 the system seems instead to have been highly influenced by the presence of other hospitals with  
18 neurosurgical units. A study conducted by the same team,[30] based partly on RRTG data and  
19 partly on the ICD9-TMPM trauma severity score,[31] suggested benefits for younger and more  
20 severe patients admitted to Level I compared to Level II TCs, irrespective of the presence or  
21 absence of a neurosurgical facility.  
22

### 23 What does the study add?

24 The study therefore shows that a trauma system requires capacity and ability in healthcare  
25 provision. The system is based on the principle of centralization in high-volume centers (hubs)  
26 improve prognosis, but also encompasses other aspects, such as demographic and orographic  
27 characteristics, and local health service organization. Level II TCs are designated to provide  
28 primary patient stabilization and surgery for hemorrhagic patients, and to appropriately limit  
29 centralization of patients with numerous comorbidities. They also have a role in night-time  
30 centralization considering, for example, that helicopters are not permitted to fly during the hours of  
31 darkness. All these aspects justify the need for and role of spoke centers within the inclusive hub  
32 and spoke system. However, the availability of neurosurgery facilities is an important variable in  
33 final patient allocation, since it can reduce the volume of patients centralized in Level I TCs.  
34

35 In the drawing of a trauma system it must be considered that the specific skills can affect the flow  
36 of patients over other operating factors such as the centralization protocols.  
37

### 38 Conclusions

39 The study highlights that patient centralization is *per se* largely driven by the availability of  
40 neurosurgical facilities. Consequently, this factor is crucial for success of the Hub and Spoke  
41  
42  
43  
44  
45  
46  
47  
48  
49  
50  
51  
52  
53  
54  
55  
56  
57  
58  
59  
60

1  
2  
3  
4  
5  
6  
7  
8  
9  
10  
11  
12  
13  
14  
15  
16  
17  
18  
19  
20  
21  
22  
23  
24  
25  
26  
27  
28  
29  
30  
31  
32  
33  
34  
35  
36  
37  
38  
39  
40  
41  
42  
43  
44  
45  
46  
47  
48  
49  
50  
51  
52  
53  
54  
55  
56  
57  
58  
59  
60

system. These considerations may be helpful in clinical governance for health systems planning to implement trauma systems.

For peer review only



### **Ethics Approval and Consent to Participate**

The study was not submitted to the local Ethic Committee (Comitato Etico Unico di Ara Vasta Romagna, IRST, Meldola, Italy) according its own indication (<http://www.irst.emr.it/LIstituto/ReteOncologicaAreaVastaRomagna/ComitatoEticoUnicoIRS TAVR/tabid/2363/Default.aspx>). The study was observational and retrospective and was conducted on data collected according the indication of the Italian regulatory board (Garante per la protezione dei dati personali, <http://www.garanteprivacy.it/web/guest>). The data were fully anonymized and de-identified before analysis

### **Consent for publication**

Not applicable

### **Funding**

No funding. Data collection and analysis were done as a part of institutional activity of participants.

### **Conflict of Interest**

I have read BioMed Central's guidance on competing interest and on behalf of all authors the corresponding author states that there is no conflict of interest

### **Data sharing statement**

All data are stored in the server of the Assessorato per la Sanità della Regione Emilia Romagna, Via Aldo Moro 21, 40127 Bologna-. The data will not be shared because properties of the Regione Emilia Romagna health system. Extra data concerning patients severity and surgical intervention are available by emailing Rossana De Palma<sup>4</sup>, [RDePalma@Regione.Emilia-Romagna.it](mailto:RDePalma@Regione.Emilia-Romagna.it).

### **Authors contribution**

Arturo Chierogato and Rossanna De Palma: idea, planning data set, data analysis, wrote the manuscript

Annalisa Volpi<sup>2</sup>, Giovanni Gordini<sup>3</sup>, planning data set, discussion of results, wrote the manuscript

Chiara Ventura<sup>4</sup>, planning data set, data analysis, discussion of results

Marco Barozzi<sup>5</sup>, Maria Luisa Rita Caspani<sup>2</sup>, Andrea Fabbri<sup>6</sup>, Anna Maria Ferrari<sup>7</sup>, Enrico Ferri<sup>8</sup>,

Aimone Giugni<sup>3</sup>, Massimiliano Marino<sup>4</sup>, Costanza Martino<sup>9</sup>, Mario Pizzamiglio<sup>10</sup>, Maurizio

Ravaldini<sup>9</sup>, Emanuele Russo<sup>9</sup>, Laura Trabucco<sup>7</sup>, Susanna Trombetti<sup>4</sup>, planning data set, discussion of results

### **Aknowledgements**

1  
2 This is to remember the contributions of Amedeo Corsi, Alfio Gamberini, Giorgio Gambale, Mario  
3 Mergoni and Luigi Targa of the “Gruppo di monitoraggio Assistenza al paziente con Trauma  
4 Grave (Monitoring Group for the Care of Severe Trauma Patients)” of the Emilia Romagna Region  
5  
6  
7  
8  
9  
10  
11  
12  
13  
14  
15  
16  
17  
18  
19  
20  
21  
22  
23  
24  
25  
26  
27  
28  
29  
30  
31  
32  
33  
34  
35  
36  
37  
38  
39  
40  
41  
42  
43  
44  
45  
46  
47  
48  
49  
50  
51  
52  
53  
54  
55  
56  
57  
58  
59  
60

For peer review only

## References

1. Di Bartolomeo S, Valent F, Sanson G, et al. Are the ACSCOT filters associated with outcome? Examining morbidity and mortality in a European setting. *Injury*. 2008 Sep;39(9):1001-6
2. Franco Taggi e Pietro Marturano. "Quanto ci costa il trauma?" Salute e Sicurezza Stradale: l'Onda Lunga del Trauma. C.A.F.I. Editore, Roma, 2007, pp. 565-570
3. <http://www.istat.it/it/archivio/137546> ISTAT, Automobile Club d'Italia, Anno 2013 Incidenti Stradali, novembre 2014.
4. <http://etsc.eu/8th-annual-road-safety-performance-index-pin-report/>, ETSC (European Transport Safety Council). Annual PIN Report. Year 2014
5. MacKenzie EJ, Rivara FP, Jurkovich GJ, et al. A National Evaluation of the Effect of Trauma-Center Care on Mortality. *NEJM*. 2006 Jan;354(4):366-78
6. <http://www.amtrauma.org/?page=TraumaLevels>
7. <http://www.gazzettaufficiale.it/eli/id/2015/06/04/15G00084/sg> DECRETO 2 aprile 2015, n. 70 Regolamento recante definizione degli standard qualitativi, strutturali, tecnologici e quantitativi relativi all'assistenza ospedaliera. (15G00084) (GU n.127 del 4-6-2015)
8. Chiara O, Cimbanassi S. Organized trauma care: does volume matter and do TCs save lives? *Curr Opin Crit Care*. 2003; 9(6): 510-4.
9. <http://statistica.regione.emilia-romagna.it>
10. [http://assr.regione.emilia-romagna.it/it/aree\\_attivita/governo-clinico/professionisti-governo/reti/traumatologica/trauma-link/normativa/dgr\\_20021267.pdf/at\\_download/file/dgr\\_2002-1267.pdf](http://assr.regione.emilia-romagna.it/it/aree_attivita/governo-clinico/professionisti-governo/reti/traumatologica/trauma-link/normativa/dgr_20021267.pdf/at_download/file/dgr_2002-1267.pdf)
11. [http://assr.regione.emilia-romagna.it/it/aree\\_attivita/governo-clinico/professionisti-governo/reti/traumatologica/trauma-link/siat](http://assr.regione.emilia-romagna.it/it/aree_attivita/governo-clinico/professionisti-governo/reti/traumatologica/trauma-link/siat)
12. Chierigato A, Paci G, Portolani L, et al. Satisfaction of patients' next of kin in a 'Hub & Spoke' ICU network. *Anaesthesia* 2014; 69 (10) :1117-26.
13. [http://assr.regione.emilia-romagna.it/it/aree\\_attivita/governo-clinico/professionisti-governo/reti/traumatologica/trauma-link/normativa/dg\\_2008\\_136.pdf/at\\_download/file/dg\\_2008\\_136.pdf](http://assr.regione.emilia-romagna.it/it/aree_attivita/governo-clinico/professionisti-governo/reti/traumatologica/trauma-link/normativa/dg_2008_136.pdf/at_download/file/dg_2008_136.pdf)

- 1
  - 2
  - 3
  - 4
  - 5
  - 6
  - 7
  - 8
  - 9
  - 10
  - 11
  - 12
  - 13
  - 14
  - 15
  - 16
  - 17
  - 18
  - 19
  - 20
  - 21
  - 22
  - 23
  - 24
  - 25
  - 26
  - 27
  - 28
  - 29
  - 30
  - 31
  - 32
  - 33
  - 34
  - 35
  - 36
  - 37
  - 38
  - 39
  - 40
  - 41
  - 42
  - 43
  - 44
  - 45
  - 46
  - 47
  - 48
  - 49
  - 50
  - 51
  - 52
  - 53
  - 54
  - 55
  - 56
  - 57
  - 58
  - 59
  - 60
14. Fabbri A, Servadei F, Marchesini G, et al. Observational approach to subjects with mild-to-moderate head injury and initial non-neurosurgical lesions. *J Neurol Neurosurg Psychiatry* 2008;79(10):1180-5.
15. Servadei F, Antonelli V, Mastrilli A, et al. Integration of image transmission into a protocol for head injury management: a preliminary report. *Br J Neurosurg* 2002; 16(1):36-42.
16. [http://assr.regione.emilia-romagna.it/it/aree\\_attivita/governo-clinico/professionisti-governo/reti/traumatologica/trauma-link/normativa/DG\\_2002\\_2497.pdf/at\\_download/file/DG\\_2002\\_2497.pdf](http://assr.regione.emilia-romagna.it/it/aree_attivita/governo-clinico/professionisti-governo/reti/traumatologica/trauma-link/normativa/DG_2002_2497.pdf/at_download/file/DG_2002_2497.pdf)
17. Di Bartolomeo S, Ventura C, Marino M, et al. The counterintuitive effect of multiple injuries in severity scoring: a simple variable improves the predictive ability of NISS. *Scand J Trauma Resusc Emerg Med.* 2011;19:26-32.
18. [http://assr.regione.emilia-romagna.it/it/aree\\_attivita/governo-clinico/professionisti-governo/reti/traumatologica/trauma-link/normativa/determina\\_6052008.pdf/at\\_download/file/determina\\_605-2008.pdf](http://assr.regione.emilia-romagna.it/it/aree_attivita/governo-clinico/professionisti-governo/reti/traumatologica/trauma-link/normativa/determina_6052008.pdf/at_download/file/determina_605-2008.pdf)
19. Baker SP, O'Neill B, Haddon W Jr, et al. The injury severity score: a method for describing patients with multiple injuries and evaluating emergency care. *J Trauma* 1974;14(3):187-96.
20. Osler T, Baker SP, Long W. A modification of the injury severity score that both improves accuracy and simplifies scoring. *J Trauma* 1997;43(6):922-5; discussion 925-6.
21. Walder AD, Yeoman PM, Turnbull A. The abbreviated injury scale as a predictor of outcome of severe head injury. *Intensive Care Med* 1995;21(7):606-9.
22. Lesko MM, Woodford M, White L, et al. Using Abbreviated Injury Scale (AIS) codes to classify Computed Tomography (CT) features in the Marshall System. *BMC Med Res Methodol* 2010 Aug 6;10:72.
23. Ross SE, O'Malley KF, Stein S, et al. Abbreviated injury scaling of head injury as a prognostic tool for functional outcome. *Accid Anal Prev* 1992 Apr;24(2):181-5.
24. Demetriades D, Kuncir E, Murray J, et al. Mortality prediction of head Abbreviated Injury Score and Glasgow Coma Scale: analysis of 7,764 head injuries. *J Am Coll Surg* 2004;199(2):216-22.
25. Teasdale G, Jennett B. Assessment of coma and impaired consciousness. A practical scale. *Lancet.* 1974;2 (7872):81-4.
26. Miller JD. Minor, moderate and severe head injury. *Neurosurg Rev* 1986;9(1-2):135-9.

- 1  
2  
3  
4  
5  
6  
7  
8  
9  
10  
11  
12  
13  
14  
15  
16  
17  
18  
19  
20  
21  
22  
23  
24  
25  
26  
27  
28  
29  
30  
31  
32  
33  
34  
35  
36  
37  
38  
39  
40  
41  
42  
43  
44  
45  
46  
47  
48  
49  
50  
51  
52  
53  
54  
55  
56  
57  
58  
59  
60
27. Gagne JJ, Glynn RJ, Avorn J, et al. A combined comorbidity score predicted mortality in elderly patients better than existing scores. *J Clin Epidemiol* 2011; 64(7):749-59.
28. Gabbe BJ, Biostat GD, Lecky FE, et al. The effect of an organized trauma system on mortality in major trauma involving serious head injury: a comparison of the United Kingdom and Victoria, Australia. *Ann Surg* 2011; 253(1):138-43.
29. Sistema integrato per l'assistenza al trauma maggiore: definizione e valutazione di un modello organizzativo. Chiara O., Consiglio Superiore di Sanità, Ministero della Salute, Roma, 2004.
30. Di Bartolomeo S, Marino M, Ventura C, et al. Evaluation of the survival benefit of Trauma-Centre care in the Italian setting. *Injury* 2014; 45: 299–303.
31. Di Bartolomeo S, Ventura C, Marino M, et al. Is the TMPM-ICD9 revolution in trauma risk-adjustment compatible with imperfect administrative coding? *Acc Anal Prev* 2011;43(6):1955-9.

**Tables****Table 1**

Case material on 5300 patients in the period 2007-2012 . Data on type of referral are limited to 5,293 patients (missing data on 7 patients concerning type of admission). AIS (Abbreviated Injury Score), ISS (Injury Severity Score), Trauma Center (TC).

**Table 2**

Patient distribution by type of SIAT in the period 2007-2012. Patients are described according to three patterns of AIS values. The reported data are restricted to the patients for whom AIS was available (5,287 patients, 13 missing patients).

The sum of the percentages reported for all patients admitted to the Regional Trauma System. The percentages calculated in each column are given between square brackets.

AIS (Abbreviated Injury Score), ISS (Injury Severity Score), Trauma center (TC).

**Table 3**

Percentage of patients indirectly admitted to the dedicated trauma center by type of referring hospital, in the period 2007-2012.

The reported data are restricted to the patients for whom AIS was available (5,287 patients, 13 missing patients).

AIS (Abbreviated Injury Score), ISS (Injury Severity Score), Trauma center (TC).

## Figures

### Figure 1:

simplified map of the Emilia Romagna region. The territory is divided in the three Trauma Systems (SIATs) and the central location of the three correspondent Trauma Centers Level I (hubs) is reported. The population of each SIAT and every its district referring to Trauma Center Level II (spoke hospital) is described.

The location and the characteristics (neurosurgical versus not surgical) of the Trauma Centers level II (spoke) is reported.



1  
2 **Appendix**  
3

4  
5 **Appendix Table 1**  
6

7 Trauma system organization and population distribution, average data per year from 2007 to 2013.

8  
9 Data Source <http://statistica.regione.emilia-romagna.it/>), Data are averaged over the years and  
10 consequently the cumulative sums of partial does not fit with overall.  
11  
12

13  
14 **Appendix Table 2**  
15

16  
17 Types of hospitals, \* not in Cesena  
18

19 **Appendix Figure 1**  
20

21  
22 Study case material  
23  
24  
25  
26  
27  
28  
29  
30  
31  
32  
33  
34  
35  
36  
37  
38  
39  
40  
41  
42  
43  
44  
45  
46  
47  
48  
49  
50  
51  
52  
53  
54  
55  
56  
57  
58  
59  
60

1  
2  
3  
4  
5  
6  
7  
8  
9  
10  
11  
12  
13  
14  
15  
16  
17  
18  
19  
20  
21  
22  
23  
24  
25  
26  
27  
28  
29  
30  
31  
32  
33  
34  
35  
36  
37  
38  
39  
40  
41  
42  
43  
44  
45  
46  
47  
48  
49  
50  
51  
52  
53  
54  
55  
56  
57  
58  
59  
60

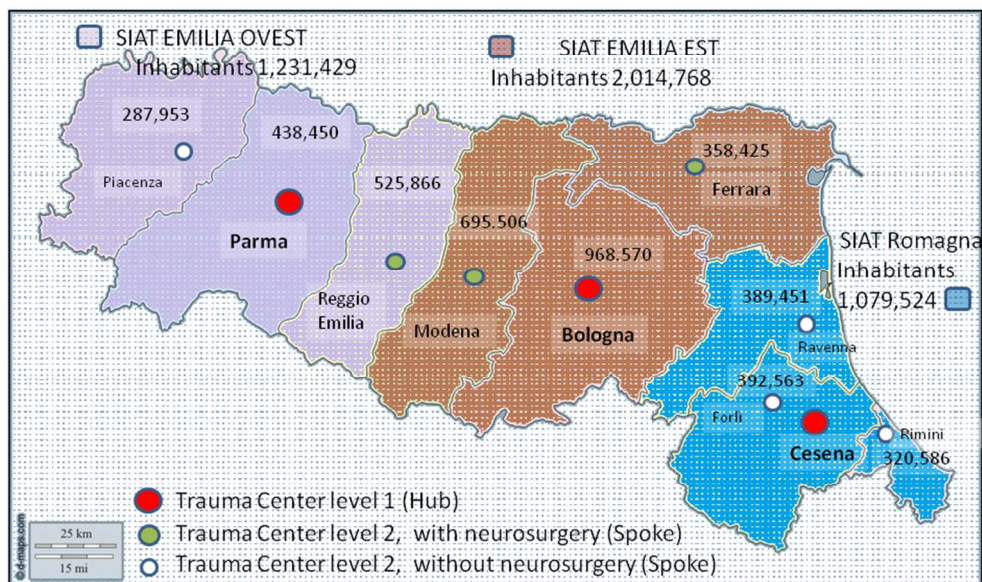

Figure 1:  
simplified map of the Emilia Romagna region. The territory is divided in the three Trauma Systems (SIATs) and the central location of the three correspondent Trauma Centers Level I (hubs) is reported. The population of each SIAT and every its district referring to Trauma Center Level II (spoke hospital) is described.  
The location and the characteristics (neurosurgical versus not surgical) of the Trauma Centers level II (spoke) is reported.

254x190mm (96 x 96 DPI)

only

## Appendix

Table 1

Trauma system organization and population distribution, average data per year from 2007 to 2012. Data Source <http://statistica.regione.emilia-romagna.it/>, Data are averaged over the years and consequently the cumulative sums of partial does not fit with overall.

|                                       | Population          | Trauma centre (Hub)  | Spoke                                      |                      |
|---------------------------------------|---------------------|----------------------|--------------------------------------------|----------------------|
| Regione Emilia Romagna                | 4,333,088<br>(100%) | 1,479,519<br>(34.1%) | 2,853,568<br>(65.9%)                       |                      |
|                                       |                     |                      | With neurosurgery (Trauma centre level II) | Without neurosurgery |
|                                       |                     |                      | 1,560,889 (57.3%)                          | 1,163,474<br>(42.7%) |
| SIAT                                  |                     |                      |                                            |                      |
| Emilia Ovest (Parma)                  |                     | 1 hospital           | 1 hospital                                 | 1 hospital           |
|                                       | 1,231,429<br>(100%) | 431,644<br>(29.2%)   | 517,368 (41.9%)                            | 284,763<br>(24.5%)   |
|                                       |                     | 1 hospital           | 2 hospitals                                | 0 hospital           |
| Emilia Est (Bologna, Modena, Ferrara) | 2,014,768<br>(100%) | 845,046<br>(57.1%)   | 1,043,521 (51.7%)                          | 0                    |
|                                       |                     | 1 hospital           | 0 hospitals                                | 6 hospitals          |
| Romagna                               | 1,079,524<br>(100%) | 202,829<br>(13.7%)   | 0                                          | 878,712<br>(75.5%)   |

Table 2, Types of hospitals, \* not in Cesena

|                                         | Level I trauma centres             | Spoke hospital                             |                      |
|-----------------------------------------|------------------------------------|--------------------------------------------|----------------------|
|                                         |                                    | With Neurosurgery (Level II trauma centre) | Without Neurosurgery |
| Hospitals                               | 3                                  | 3                                          | 7                    |
| Trauma center level                     | I                                  | II                                         | III                  |
| Helicopter                              | At the hospital*, not night flight |                                            |                      |
| Emergency abdominal or thoracic surgery | 24-hour ward                       | 24-hour ward                               | 24-hour ward         |
| Cardiac surgery                         | 24-hour ward*                      |                                            |                      |
| Neurosurgery                            | 24-hour ward                       | 24-hour ward                               |                      |
| Orthopedic surgery                      | 24-hour ward*                      | 24-hour ward                               | On call              |
| Interventional radiology                | On call                            | On call                                    |                      |
| Transfusion service                     | On call                            | On call                                    | On call              |
| Maxillo-facial surgery                  | On call                            | On call                                    | On call              |
| Trauma service                          | yes                                | No                                         | No                   |
| Coordination of the SIAT Trauma System  | yes                                | No                                         | No                   |

1  
2  
3  
4  
5  
6  
7  
8  
9  
10  
11  
12  
13  
14  
15  
16  
17  
18  
19  
20  
21  
22  
23  
24  
25  
26  
27  
28  
29  
30  
31  
32  
33  
34  
35  
36  
37  
38  
39  
40  
41  
42  
43  
44  
45  
46  
47  
48  
49  
50  
51  
52  
53  
54  
55  
56  
57  
58  
59  
60

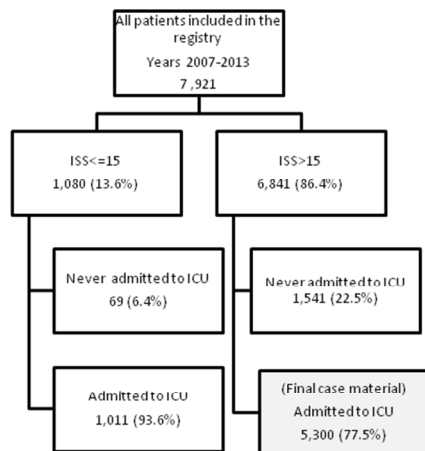

254x190mm (96 x 96 DPI)

ew only

STROBE 2007 (v4) Statement—Checklist of items that should be included in reports of *cross-sectional studies*

| Section/Topic                | Item # | Recommendation                                                                                                                                                                       | Reported on page # |
|------------------------------|--------|--------------------------------------------------------------------------------------------------------------------------------------------------------------------------------------|--------------------|
| Title and abstract           | 1      | (a) Indicate the study’s design with a commonly used term in the title or the abstract                                                                                               | 1                  |
|                              |        | (b) Provide in the abstract an informative and balanced summary of what was done and what was found                                                                                  | 2                  |
| <b>Introduction</b>          |        |                                                                                                                                                                                      |                    |
| Background/rationale         | 2      | Explain the scientific background and rationale for the investigation being reported                                                                                                 | 3                  |
| Objectives                   | 3      | State specific objectives, including any prespecified hypotheses                                                                                                                     | 4                  |
| <b>Methods</b>               |        |                                                                                                                                                                                      |                    |
| Study design                 | 4      | Present key elements of study design early in the paper                                                                                                                              | 4                  |
| Setting                      | 5      | Describe the setting, locations, and relevant dates, including periods of recruitment, exposure, follow-up, and data collection                                                      | 4-5                |
| Participants                 | 6      | (a) Give the eligibility criteria, and the sources and methods of selection of participants                                                                                          | 5                  |
| Variables                    | 7      | Clearly define all outcomes, exposures, predictors, potential confounders, and effect modifiers. Give diagnostic criteria, if applicable                                             | Not applicable     |
| Data sources/<br>measurement | 8*     | For each variable of interest, give sources of data and details of methods of assessment (measurement). Describe comparability of assessment methods if there is more than one group | Not applicable     |
| Bias                         | 9      | Describe any efforts to address potential sources of bias                                                                                                                            | 5                  |
| Study size                   | 10     | Explain how the study size was arrived at                                                                                                                                            | Nor applicable     |
| Quantitative variables       | 11     | Explain how quantitative variables were handled in the analyses. If applicable, describe which groupings were chosen and why                                                         | 5 and 6            |
| Statistical methods          | 12     | (a) Describe all statistical methods, including those used to control for confounding                                                                                                | 5                  |
|                              |        | (b) Describe any methods used to examine subgroups and interactions                                                                                                                  | 5                  |
|                              |        | (c) Explain how missing data were addressed                                                                                                                                          | Not applicable     |
|                              |        | (d) If applicable, describe analytical methods taking account of sampling strategy                                                                                                   | Not applicable     |
|                              |        | (e) Describe any sensitivity analyses                                                                                                                                                | Not applicable     |
| <b>Results</b>               |        |                                                                                                                                                                                      | 6                  |

1  
2  
3  
4  
5  
6  
7  
8  
9  
10  
11  
12  
13  
14  
15  
16  
17  
18  
19  
20  
21  
22  
23  
24  
25  
26  
27  
28  
29  
30  
31  
32  
33  
34  
35  
36  
37  
38  
39  
40  
41  
42  
43  
44  
45  
46  
47  
48  
49

|                          |     |                                                                                                                                                                                                                                                                                                                                                                                                               |                                                                      |
|--------------------------|-----|---------------------------------------------------------------------------------------------------------------------------------------------------------------------------------------------------------------------------------------------------------------------------------------------------------------------------------------------------------------------------------------------------------------|----------------------------------------------------------------------|
| Participants             | 13* | (a) Report numbers of individuals at each stage of study—eg numbers potentially eligible, examined for eligibility, confirmed eligible, included in the study, completing follow-up, and analysed<br>(b) Give reasons for non-participation at each stage<br>(c) Consider use of a flow diagram                                                                                                               | 6<br><br>Appendix, figure 1                                          |
| Descriptive data         | 14* | (a) Give characteristics of study participants (eg demographic, clinical, social) and information on exposures and potential confounders<br>(b) Indicate number of participants with missing data for each variable of interest                                                                                                                                                                               |                                                                      |
| Outcome data             | 15* | Report numbers of outcome events or summary measures                                                                                                                                                                                                                                                                                                                                                          | Not applicable                                                       |
| Main results             | 16  | (a) Give unadjusted estimates and, if applicable, confounder-adjusted estimates and their precision (eg, 95% confidence interval). Make clear which confounders were adjusted for and why they were included<br>(b) Report category boundaries when continuous variables were categorized<br>(c) If relevant, consider translating estimates of relative risk into absolute risk for a meaningful time period | Page 6-11, table 1 to 3<br>Page 6-11, table 1 to 3<br>Not applicable |
| Other analyses           | 17  | Report other analyses done—eg analyses of subgroups and interactions, and sensitivity analyses                                                                                                                                                                                                                                                                                                                | Not applicable                                                       |
| <b>Discussion</b>        |     |                                                                                                                                                                                                                                                                                                                                                                                                               |                                                                      |
| Key results              | 18  | Summarise key results with reference to study objectives                                                                                                                                                                                                                                                                                                                                                      | 11                                                                   |
| Limitations              | 19  | Discuss limitations of the study, taking into account sources of potential bias or imprecision. Discuss both direction and magnitude of any potential bias                                                                                                                                                                                                                                                    |                                                                      |
| Interpretation           | 20  | Give a cautious overall interpretation of results considering objectives, limitations, multiplicity of analyses, results from similar studies, and other relevant evidence                                                                                                                                                                                                                                    | 12                                                                   |
| Generalisability         | 21  | Discuss the generalisability (external validity) of the study results                                                                                                                                                                                                                                                                                                                                         | 12                                                                   |
| <b>Other information</b> |     |                                                                                                                                                                                                                                                                                                                                                                                                               |                                                                      |
| Funding                  | 22  | Give the source of funding and the role of the funders for the present study and, if applicable, for the original study on which the present article is based                                                                                                                                                                                                                                                 | 13                                                                   |

\*Give information separately for cases and controls in case-control studies and, if applicable, for exposed and unexposed groups in cohort and cross-sectional studies.

**Note:** An Explanation and Elaboration article discusses each checklist item and gives methodological background and published examples of transparent reporting. The STROBE checklist is best used in conjunction with this article (freely available on the Web sites of PLoS Medicine at <http://www.plosmedicine.org/>, Annals of Internal Medicine at <http://www.annals.org/>, and Epidemiology at <http://www.epidem.com/>). Information on the STROBE Initiative is available at [www.strobe-statement.org](http://www.strobe-statement.org).

# BMJ Open

## How health service delivery guides the allocation of major trauma patients in the intensive care units of the inclusive (Hub & Spoke) trauma system of the Emilia Romagna Region (Italy). A cross sectional study



|                                 |                                                                                                                                                                                                                                                                                                                                                                                                                                                                                                                                                                                                                                                                                                                                        |
|---------------------------------|----------------------------------------------------------------------------------------------------------------------------------------------------------------------------------------------------------------------------------------------------------------------------------------------------------------------------------------------------------------------------------------------------------------------------------------------------------------------------------------------------------------------------------------------------------------------------------------------------------------------------------------------------------------------------------------------------------------------------------------|
| Journal:                        | <i>BMJ Open</i>                                                                                                                                                                                                                                                                                                                                                                                                                                                                                                                                                                                                                                                                                                                        |
| Manuscript ID                   | bmjopen-2017-016415.R1                                                                                                                                                                                                                                                                                                                                                                                                                                                                                                                                                                                                                                                                                                                 |
| Article Type:                   | Research                                                                                                                                                                                                                                                                                                                                                                                                                                                                                                                                                                                                                                                                                                                               |
| Date Submitted by the Author:   | 31-May-2017                                                                                                                                                                                                                                                                                                                                                                                                                                                                                                                                                                                                                                                                                                                            |
| Complete List of Authors:       | Chieregato, Arturo; ASST Grande Ospedale Metropolitano Niguarda, Neuroranimazione<br>Volpi, Annalisa<br>Gordini, Giovanni; Maggiore Hospital Trauma Center, Trauma ICU<br>Ventura, Chiara; Regional Agency for Health and Social Care of Emilia-Romagna,<br>Barozzi, Marco<br>Caspani, Maria Luisa Rita<br>Fabbri, Andrea<br>Ferrari, Anna Maria<br>Ferri, Enrico<br>Giugni, Aimone<br>Marino, Massimiliano; Regional Agency for Health and Social Care of Emilia-Romagna,<br>Martino, Costanza<br>Pizzamiglio, Mario<br>Ravaldini, Maurizio<br>Russo, Emanuele; AUSL Cesena, UO Anestesia e Rianimazione<br>Trabucco, Laura<br>Trombetti, Susanna<br>De Palma, Rossana; Regional Agency for Health and Social Care of Emilia-Romagna, |
| <b>Primary Subject Heading</b>: | Emergency medicine                                                                                                                                                                                                                                                                                                                                                                                                                                                                                                                                                                                                                                                                                                                     |
| Secondary Subject Heading:      | Public health                                                                                                                                                                                                                                                                                                                                                                                                                                                                                                                                                                                                                                                                                                                          |
| Keywords:                       | Adult intensive & critical care < ANAESTHETICS, Paediatric intensive & critical care < ANAESTHETICS, Clinical governance < HEALTH SERVICES ADMINISTRATION & MANAGEMENT, Quality in health care < HEALTH SERVICES ADMINISTRATION & MANAGEMENT, NEUROSURGERY, TRAUMA MANAGEMENT                                                                                                                                                                                                                                                                                                                                                                                                                                                          |
|                                 |                                                                                                                                                                                                                                                                                                                                                                                                                                                                                                                                                                                                                                                                                                                                        |



1  
2  
3  
4  
5  
6  
7  
8  
9  
10  
11  
12  
13  
14  
15  
16  
17  
18  
19  
20  
21  
22  
23  
24  
25  
26  
27  
28  
29  
30  
31  
32  
33  
34  
35  
36  
37  
38  
39  
40  
41  
42  
43  
44  
45  
46  
47  
48  
49  
50  
51  
52  
53  
54  
55  
56  
57  
58  
59  
60

SCHOLARONE™  
Manuscripts

For peer review only

1  
2  
3 **How health service delivery guides the allocation of major trauma patients in the intensive care**  
4 **units of the inclusive (Hub & Spoke) trauma system of the Emilia Romagna Region (Italy). A**  
5 **cross sectional study**  
6  
7  
8

9  
10 **Authors:** Arturo Chieregato<sup>1</sup>, Annalisa Volpi<sup>2</sup>, Giovanni Gordini<sup>3</sup>, Chiara Ventura<sup>4</sup>, Marco Barozzi<sup>5</sup>,  
11 Maria Luisa Rita Caspani<sup>2</sup>, Andrea Fabbri<sup>6</sup>, Anna Maria Ferrari<sup>7</sup>, Enrico Ferri<sup>8</sup>, Aimone Giugni<sup>3</sup>,  
12 Massimiliano Marino<sup>4</sup>, Costanza Martino<sup>9</sup>, Mario Pizzamiglio<sup>10</sup>, Maurizio Ravaldini<sup>9</sup>, Emanuele  
13 Russo<sup>9</sup>, Laura Trabucco<sup>7</sup>, Susanna Trombetti<sup>4</sup>, Rossana De Palma<sup>4</sup>  
14  
15  
16

17  
18 **Affiliations:**  
19

20 Arturo Chieregato<sup>1</sup>, [arturo.chieregato@gmail.com](mailto:arturo.chieregato@gmail.com), Neuroranimazione, ASST Grande Ospedale  
21 Metropolitano Niguarda, Milano  
22

23 Annalisa Volpi<sup>2</sup>, [avolpi@ao.pr.it](mailto:avolpi@ao.pr.it), Anestesia e Rianimazione, Azienda Ospedaliero-Universitaria di  
24 Parma  
25

26 Giovanni Gordini<sup>3</sup>, [G.Gordini@118er.it](mailto:G.Gordini@118er.it), Rianimazione-118, Azienda USL di Bologna  
27

28 Chiara Ventura<sup>4</sup>, [CVentura@Regione.Emilia-Romagna.it](mailto:CVentura@Regione.Emilia-Romagna.it), Area Governo Clinico Agenzia Sanitaria e  
29 Sociale Regione Emilia Romagna, Bologna  
30

31 Marco Barozzi<sup>5</sup>, [marco.barozzi@auslromagna.it](mailto:marco.barozzi@auslromagna.it), Pronto Soccorso e Medicina d'Urgenza, Ospedale di  
32 Cesena, Azienda USL della Romagna  
33

34 Maria Luisa Rita Caspani<sup>2</sup>, [mcaspani@ao.pr.it](mailto:mcaspani@ao.pr.it), Anestesia e Rianimazione, Azienda Ospedaliero-  
35 Universitaria di Parma  
36

37 Andrea Fabbri<sup>6</sup>, [andrea.fabbri@auslromagna.it](mailto:andrea.fabbri@auslromagna.it), Pronto Soccorso e Medicina d'Urgenza, Ospedale di  
38 Forlì, Azienda AUSL di Romagna  
39

40 Anna Maria Ferrari<sup>7</sup>, [annamaria.ferrari@asmn.re.it](mailto:annamaria.ferrari@asmn.re.it), Pronto Soccorso e Medicina d'Urgenza, Azienda  
41 Ospedaliera Arcispedale Santa Maria Nuova - IRCCS  
42

43 Enrico Ferri<sup>8</sup>, [ferrihenrico1@gmail.com](mailto:ferrihenrico1@gmail.com), Anestesia e Rianimazione, Azienda Ospedaliero-Universitaria  
44 di Ferrara  
45

46 Aimone Giugni<sup>3</sup>, [aimonegiugni@gmail.com](mailto:aimonegiugni@gmail.com), Rianimazione-118, Azienda USL di Bologna  
47

48 Massimiliano Marino<sup>4</sup>, [mmarino@Regione.Emilia-Romagna.it](mailto:mmarino@Regione.Emilia-Romagna.it), Area Governo clinico dell'Agenzia  
49 Sanitaria Regionale, Regione Emilia Romagna, Bologna  
50

51 Costanza Martino<sup>9</sup>, [costanza.martino@auslromagna.it](mailto:costanza.martino@auslromagna.it), Anestesia e Rianimazione, Ospedale di Cesena,  
52 AUSL di Romagna  
53  
54  
55  
56  
57  
58  
59  
60

1  
2  
3 Mario Pizzamiglio<sup>10</sup>, [mpizzamiglio@libero.it](mailto:mpizzamiglio@libero.it), Anestesia e Rianimazione, Azienda USL di Piacenza

4  
5 Maurizio Ravaldini<sup>9</sup>, [maurizio.ravaldini@auslromagna.it](mailto:maurizio.ravaldini@auslromagna.it), Anestesia e Rianimazione, Ospedale di  
6  
7 Cesena, AUSL della Romagna

8  
9 Emanuele Russo<sup>9</sup>, [lelegaiola@gmail.com](mailto:lelegaiola@gmail.com), Anestesia e Rianimazione, Ospedale di Cesena, AUSL della  
10  
11 Romagna

12 Laura Trabucco<sup>7</sup>, [laura.trabucco@asmn.re.it](mailto:laura.trabucco@asmn.re.it), Pronto Soccorso e Medicina d'Urgenza, Azienda  
13  
14 Ospedaliera Arcispedale Santa Maria Nuova - IRCCS

15 Susanna Trombetti<sup>4</sup>, [susanna.trombetti@gmail.com](mailto:susanna.trombetti@gmail.com), Area Governo clinico dell'Agazia Sanitaria  
16  
17 Regionale, Regione Emilia Romagna, Bologna

18  
19 Rossana De Palma<sup>4</sup>, [RDePalma@Regione.Emilia-Romagna.it](mailto:RDePalma@Regione.Emilia-Romagna.it), Area Governo clinico dell'Agazia  
20  
21 Sanitaria Regionale, Regione Emilia Romagna, Bologna

22  
23  
24 **Corresponding author**

25  
26 Dr. Arturo Chierigato,

27  
28 Neuroranimazione, Dipartimento di Neuroscienze e Dipartimento di Anestesia,

29  
30 ASST Grande Ospedale Metropolitano Niguarda, Piazza Ospedale Maggiore, Milano, Italy

31  
32 Telephone and Telefax numbers: +39 349 4664603 (mobile);

33  
34  
35 E-mail: [arturo.chierigato@gmail.com](mailto:arturo.chierigato@gmail.com)  
36  
37  
38  
39  
40  
41  
42  
43  
44  
45  
46  
47  
48  
49  
50  
51  
52  
53  
54  
55  
56  
57  
58  
59  
60

## Abstract

**Objective:** To evaluate cross-sectional patient distribution and standardized 30-day mortality in the intensive care units (ICU) of an inclusive hub and spoke trauma system.

**Setting:** ICUs of the Trauma System (SIAT) of Emilia-Romagna, an Italian region with a population of approximately 4.5 million.

**Participants:** 5,300 patients with an Injury Severity Score (ISS) >15, were admitted to the regional ICUs and recorded in the Regional Severe Trauma Registry, between 2007 and 2012. Patients were classified by the Abbreviated Injury Score as follow a) traumatic brain injury, b) multiple injuries, c) extracranial lesions. The SIATs were divided into those with at least one neurosurgical Level II trauma centre (TC) and those with a neurosurgical unit in the Level I TC only.

### **Results:**

A higher proportion of patients (out of all SIAT patients) were admitted to the Level I TC at the head of the SIAT with no additional neurosurgical facilities (1083/1472, 73.6%) compared to the Level I TCs heading SIATs with neurosurgical Level II TCs (1905/3815; 49.9%). A similar percentage of patients were admitted to Level I TCs (1905/3815; 49.9%) and neurosurgical Level II TCs (1702/3815, 44.6%) in the SIATs with neurosurgical Level II TCs. Observed versus expected mortality (OE) was not statistically different among the three types of centre with a neurosurgical unit, however the best mean OE values were observed in the Level I TC in the SIAT with no neurosurgical unit.

**Conclusion:** The Hub and Spoke concept was fully applied in the SIAT in which neurosurgical facilities were available in the Level I TC only. The performance of this system suggests that competition among Level I and Level II TCs in the same Trauma System reduces performance in both. The density of neurosurgical centres must be considered by public health system governors before implementing Trauma Systems.

1  
2  
3  
4  
5 **Article summary.**  
6  
7

8 **Strengths and limitations of this study**  
9

10 The study is based on a seven-year institutional prospective cross-sectional data collection, including  
11 30-day mortality data, relating to an entire Italian Region. Although the data were gathered in a specific  
12 Italian region with a well-established public health system, they are potentially generalizable to other  
13 densely populated countries with a predominance of publicly delivered healthcare services.  
14

15 The association between a higher number of neurosurgical centres and greater competition in patient  
16 allocation must be considered with caution because several potential sources of differences among  
17 SIATs and TCs were not recorded  
18

19 Considering the highly selected setting and similarities in the basic standard of care among centres, a  
20 larger sample is probably needed to detect any minor differences in outcome related to final trauma  
21 patient allocation.  
22  
23  
24  
25  
26  
27  
28  
29  
30  
31  
32  
33  
34  
35  
36  
37  
38  
39  
40  
41  
42  
43  
44  
45  
46  
47  
48  
49  
50  
51  
52  
53  
54  
55  
56  
57  
58  
59  
60

## Background

Trauma is a major issue for society and a challenge for health policy makers. In Italy it is chiefly associated with road accidents [1-4] Regionalized trauma systems have been designed in many countries to provide a coordinated, organized response to injury [5] Concentrating patients in a few Level I trauma centres (TC) to ensure prompt, specialized care should improve patient outcomes.[5] Health authorities in several countries have used guidelines to designate hospitals as Level I to IV TCs.[6] There is a general consensus that Level I TCs should admit at least 200 patients with major trauma per year.[5,7]

Currently most regional trauma systems in the United States are based on the “exclusive” design,-but this prevents non-TC acute care facilities from participating in the treatment of less severe trauma patients, with the risk of expertise at non-TCs falling below critical levels. By contrast Europe - which is more urbanized and has a higher density of hospitals - more frequently adopts an “inclusive” model, encompassing non-TC hospitals (spoke centers) that care chiefly for less severe trauma [8]. In this system, Level 1 TCs (hubs) are central to trauma system organization [8]. They directly admit the patients who appear most severe at the scene and indirectly receive those who are undertriaged at first admission or who deteriorate after admission to a spoke centre.

In 2002, the regional health service of Emilia Romagna, in the north of Italy, designed three trauma systems, headed by three Level I TCs, based on geographic location, previous organizational history, and presence of clinical expertise (DGR 1267/2002)[9-10]. The organizations are referred to as “Sistema Integrato Assistenza Traumi (SIAT: Integrated System for Trauma Patient Care)”, each representing a separate, specific Trauma System. In addition to a Level I TC, two of these SIATs also included Level II TCs with neurosurgical units. Considering the importance of traumatic brain injury (TBI) in trauma patients, it could be that these neurosurgical units centralize patients who would otherwise have been admitted to Level I TCs.

The aim of this study was to describe access to intensive care by major trauma patients, within the various SIATs, ten years after establishment of Emilia Romagna’s Integrated System, and to discuss whether the availability of neurosurgical facilities may had influenced this process.

## Material and Methods

Setting: Emilia-Romagna is an Italian region with a population of approximately 4.5 million (Figure 1 and online supplement Appendix Table 1) [11].

1  
2  
3 The “inclusive” model of trauma care included community and teaching hospitals not dedicated  
4 exclusively to trauma. All were linked to a dedicated Emergency Medical Service, including a  
5 helicopter. The SIAT characteristics are described in the Appendix (Appendix Table 2)[6]. The  
6 underlying philosophy of the inclusive hub and spoke trauma system is that Level I TCs function as  
7 hubs within highly specialized hospitals and other Level II TC facilities serve as “spokes”. Some Level  
8 II TCs have neurosurgical units. The SIATs differ from each other in that one of them has no  
9 neurosurgical Level II unit (Romagna) while neurosurgical units are present in the other two.

10  
11  
12 In summary, the Trauma System is organized according to:

13  
14 a) three subtypes of centre:

- 15 • Level I TCs: Bologna Maggiore, Parma, Cesena hospitals
- 16 • Level II TCs with neurosurgery: Modena Baggiovara, Ferrara, Reggio Emilia hospitals
- 17 • Level II TCs with no neurosurgery: Rimini, Riccione, Forlì, Ravenna, Faenza, Lugo, Piacenza

18  
19 b) two subtypes of SIAT:

- 20 • SIAT with a neurosurgical Level II TC;
- 21 • SIAT with no neurosurgical Level II TC.

22  
23 The system embraces the concept of back transferring patients from the hub to the spoke, once they  
24 have been stabilized and specialist problems have been solved [12]. The ICU network is further  
25 supported by a network of rehabilitation units [13].

26  
27 The protocols to describe direct access from the scene to the Level I TC and secondary referral from  
28 Level II TCs were drawn up in each of three Trauma Systems. However, Romagna has been  
29 implementing telemedicine for TBI since the 1990s [14-15].

30  
31 Since 2007, data on the severity of patient admissions in the Emilia Romagna region have been  
32 prospectively collected by the three Level I TCs and ten other spoke hospitals in the regional severe  
33 trauma registry (Registro Regionale Traumi Gravi, RRTG) [16,17]. The system has been regularly  
34 monitored by a commission which checks data and implements system organization [18].

### 35 36 Case material

37  
38 The cross-sectional study was conducted using data from the RRTG. The case material analysed for the  
39 study consisted of consecutive cases collected from 2007 to 2012 (Appendix Figure 1). The criteria for  
40 inclusion in the registry was traumatic injury with an Injury Severity Score (ISS) greater than 15 or  
41 admission to an intensive care unit (ICU) [19-20]. Consequently, a potential source of bias is that  
42 patients admitted to the regular ward were not considered in the study. Injury severity was coded  
43 according to the Abbreviated Injury Score 1990 (AIS) (1998 update), by a trained coder at each  
44  
45  
46  
47  
48  
49  
50  
51  
52  
53  
54  
55  
56  
57  
58  
59  
60



1  
2  
3 hospital. Training was self-managed by the regional authorities, with no official certification by the  
4 Association for the Advancement of Automotive Medicine.  
5  
6  
7

### 8 Descriptive analysis of patient distribution

9  
10 Patients can be transferred from one hospital to another within the trauma system but are recorded in  
11 the registry only once. The following attribution criteria were applied for registry entries: a) the first  
12 admitting hospital, b) the data recorded in the ward providing the most intensive therapy, in the said  
13 hospital.  
14  
15  
16

17 Patients were also classified in three categories by type of anatomical lesion. The objective was to  
18 identify patients with clinically relevant extracranial injuries, those with clinically relevant cranial or  
19 spinal injuries, and those with both clinically relevant extracranial or cranial/spinal injuries.  
20  
21  
22

23 We used an a priori AIS cutoff of  $<3$  and  $\geq 3$  to classify relevant or non-clinical lesions, respectively. An  
24 AIS cranial score  $\geq 3$  was used to classify moderate or severe TBI [21-24], although this differs from  
25 the conventional classification [25-26].  
26  
27

28 Accordingly, the patients were classified as follows:

- 29
- 30 • patients with moderate or severe TBI and/or cervical spine injury: with an AIS cranial score value  
31  $\geq 3$  and an AIS extracranial score;  
32
  - 33 • patients with severe multiple injuries including TBI and/or cervical spine injury: with extracranial  
34 and cranial lesions, both with AIS score  $\geq 3$ ;  
35
  - 36 • patients with extracranial lesions: with at least one extracranial AIS score of  $\geq 3$  and a cranial AIS  
37 of  $< 3$ .  
38  
39

40 Patients' clinical severity was also described by the ISS, by the AIS and the Glasgow Coma Scale  
41 (GCS) [25]. Comorbidities were assessed by the Charlson Score Index [27].  
42  
43

44 The data were analyzed descriptively. Continuous variables were expressed as mean, standard  
45 deviation, median and range. Age was described both as a continuous value and in three categories  
46 according to cut-off ages of 20 and 70 years.  
47  
48  
49

### 50 Standardized mortality

51  
52 Thirty-day patient mortality was standardized according to several covariates using a hierarchical  
53 logistic regression model. This has already been published by our group [28]. The model included the  
54 following covariates: age (continuous variable), ISS (continuous variable), gender (continuous  
55 variable), mechanism of injury (traffic accident, fall, penetrating, other, missing or unknown), motor  
56  
57  
58  
59  
60

GCS (continuous variable), systolic blood pressure (0-49 mmHg, 50-89 mmHg, 90-179 mmHg,  $\geq 180$  mmHg). Taking the sum of observed deaths and the sum of the individual probability of death (from 0 to 1, obtained by solving the logistic equation), we determined the Observed/Expected ratio (OE)[29]. The OE was calculated separately for patients with moderate or severe TBI or cervical spine injury and patients with severe multiple injuries, and was compared among a) Level I TC in SIATs without a neurosurgical Level I TC (Cesena hospital), b) Level I TCs in SIATs with neurosurgical spokes (Bologna Maggiore and Parma hospitals) and c) neurosurgical Level II TCs (Modena Baggiovara, Ferrara, Reggio Emilia hospitals).

All analyses were carried out with the SAS 8.2 System (SAS Institute, North Carolina). The study was conducted in adherence to regional privacy regulation No.3 of Emilia-Romagna dated 24 April 2006 (Title: Sensitive data processing) and act N.1 of 30 May 2014, which was still in force at the time of writing. In addition, each patient had an anonymous identifier assigned by the Regione Emilia Romagna to enable each individual to be tracked over time without jeopardizing patient privacy.

## Results

After applying the inclusion criteria, 5,300 patients were eligible for the study. However, details on the AIS categories were available for only 5,287 patients.

General and specific characteristics of patients (reported in Table 1).

Table 1: Case material on 5,300 patients in the period 2007-2012. Data on type of referral are limited to 5,293 patients (missing data on 7 patients concern type of admission). Comorbidities were assessed by the Charlson Score Index<sup>27</sup>, Abbreviated Injury Score (AIS)<sup>20</sup>, Glasgow Coma Scale (GCS)<sup>25</sup>, Injury Severity Score (ISS)<sup>19</sup>, Trauma Centre (TC). Traumatic Brain Injury (TBI)

| Variable          | Classification | Trauma System | TC level I (Hub) and direct admission | TC level I (Hub) and secondary referral | Neuro surgical TC level II (Spoke) and direct admission | Neuro surgical TC level II (Spoke) and secondary admission | Non-neuro surgical TC level II (Spoke) |
|-------------------|----------------|---------------|---------------------------------------|-----------------------------------------|---------------------------------------------------------|------------------------------------------------------------|----------------------------------------|
| No.               |                | 5300          | *2,274 (43.1%)                        | *716 (13.5%)                            | *1,600 (30.2%)                                          | *102 (1.9%)                                                | **600 (11.3%)                          |
| Age, Median (IQR) |                | 46 $\pm$ 38   | 44 $\pm$ 38                           | 48 $\pm$ 39                             | 47 $\pm$ 37                                             | 56,5 $\pm$ 39                                              | 49 $\pm$ 41                            |
| Gender, No (%)    | male           | 3,905 (73.7%) | 1,720 (75.5)                          | 512 (71.5)                              | 1,182 (73.8%)                                           | 68 (66.7%)                                                 | 421 (70.1%)                            |

| Variable                                          | Classification                                              | Trauma System | TC level I (Hub) and direct admission | TC level I (Hub) and secondary referral | Neuro surgical TC level II (Spoke) and direct admission | Neuro surgical TC level II (Spoke) and secondary admission | Non-neuro surgical TC level II (Spoke) |
|---------------------------------------------------|-------------------------------------------------------------|---------------|---------------------------------------|-----------------------------------------|---------------------------------------------------------|------------------------------------------------------------|----------------------------------------|
|                                                   |                                                             |               | (%)                                   | (%)                                     |                                                         |                                                            |                                        |
| Type of trauma, No (%)                            | Closed                                                      | 5,160 (97.4%) | 2,222 (97.6%)                         | 695 (97.1%)                             | 1,573 (95.3%)                                           | 100 (98.0%)                                                | 567 (94.3%)                            |
|                                                   | Penetrating                                                 | 113 (2.1%)    | 50 (2.2%)                             | 15 (2.1%)                               | 28 (1.7%)                                               | 2 (2.0%)                                                   | 18 (3.0%)                              |
|                                                   | Missing                                                     | 27 (0.5%)     | 5 (0.2%)                              | 6 (0.8%)                                | -                                                       | -                                                          | 16 (2.7%)                              |
| Mechanism of injury, No (%)                       | Traffic                                                     | 3,517 (66.4%) | 1,561 (68.6%)                         | 370 (51.7%)                             | 1,107 (69.1%)                                           | 50 (49.0%)                                                 | 427 (71.1%)                            |
|                                                   | Minor Fall                                                  | 1,112 (21.0%) | 454 (19.9%)                           | 219 (30.6%)                             | 324 (20.2%)                                             | 37 (36.3%)                                                 | 77 (12.8%)                             |
|                                                   | Major fall                                                  | 153 (2.9%)    | 59 (2.6%)                             | 18 (2.5%)                               | 65 (4.1%)                                               | 2 (2.0%)                                                   | 9 (1.5%)                               |
|                                                   | Crush                                                       | 129 (2.4%)    | 54 (2.4%)                             | 15 (2.1%)                               | 34 (2.1%)                                               | 1 (1.0%)                                                   | 25 (4.2%)                              |
|                                                   | Other                                                       | 361 (6.8%)    | 145 (6.4%)                            | 89 (12.4%)                              | 70 (4.4%)                                               | 12 (11.8%)                                                 | 45 (7.5%)                              |
|                                                   | Missing                                                     | 28 (0.5%)     | 4 (0.2%)                              | 5 (0.7%)                                | 1 (0.1%)                                                | -                                                          | 18 (3.0%)                              |
| Charlson Comorbidity Index <sup>28</sup> , No (%) | 0                                                           | 4,595 (86.7%) | 2,035 (89.4%)                         | 619 (86.5%)                             | 1,351 (84.4%)                                           | 85 (83.3%)                                                 | 502 (85.5%)                            |
|                                                   | 1                                                           | 317 (6.0%)    | 102 (4.5%)                            | 52 (7.3%)                               | 101 (6.3%)                                              | 8 (7.8%)                                                   | 54 (9.0%)                              |
|                                                   | ≥2                                                          | 388 (7.3%)    | 140 (6.2%)                            | 45 (6.3%)                               | 149 (9.3%)                                              | 9 (8.8%)                                                   | 45 (7.5%)                              |
| ISS <sup>19</sup> , median (IQR)                  |                                                             | 26 ± 12       | 26 ± 12                               | 25 ± 12                                 | 27 ± 13                                                 | 25 ± 11                                                    | 25 ± 14                                |
| TBI, No (%)                                       | AIS <sub>c</sub> ≥3                                         | 1,298 (24.5%) | 583 (25.6%)                           | 319 (44.6%)                             | 299 (18.7%)                                             | 25 (24.5%)                                                 | 70 (11.6%)                             |
| Multiple injury, No (%)                           | AIS <sub>c</sub> ≥3 and AIS <sub>max</sub> ≥3 <sup>20</sup> | 1,985 (37.4%) | 911 (40.0%)                           | 230 (32.1%)                             | 650 (40.6%)                                             | 30 (39.4%)                                                 | 164 (27.3%)                            |
| Extracranial injury, No (%)                       | AIS max extracranial ≥3 <sup>20</sup>                       | 2,010 (37.9%) | 780 (34.3%)                           | 165 (23.0%)                             | 651 (40.7%)                                             | 47 (46.1%)                                                 | 366 (60.9%)                            |
| Not defined, No (%)                               | AIS missing <sup>20</sup>                                   | 7 (0.2%)      | 3 (0.1%)                              | 2 (0.3%)                                | 1 (0.01%)                                               |                                                            | 1(0.2%)                                |
| Pupil reactivity to light at admission, No (%)    | Bilaterally reactive                                        | 4,402 (83.1%) | 1,866 (81.9%)                         | 564 (78.8%)                             | 1,362 (85.1%)                                           | 94 (92.2%)                                                 | 514 (85.5%)                            |

| Variable                                             | Classification                | Trauma System | TC level I (Hub) and direct admission | TC level I (Hub) and secondary referral | Neuro surgical TC level II (Spoke) and direct admission | Neuro surgical TC level II (Spoke) and secondary admission | Non-neuro surgical TC level II (Spoke) |
|------------------------------------------------------|-------------------------------|---------------|---------------------------------------|-----------------------------------------|---------------------------------------------------------|------------------------------------------------------------|----------------------------------------|
|                                                      |                               |               | %)                                    | %)                                      |                                                         |                                                            |                                        |
|                                                      | One pupil dilated unreactive  | 370 (7.0%)    | 177 (7.8%)                            | 54 (7.5%)                               | 115 (7.2%)                                              | 3 (2.9%)                                                   | 20 (3.3%)                              |
|                                                      | Two pupils dilated unreactive | 238 (4.5%)    | 128 (5.6%)                            | 24 (3.3%)                               | 62 (3.9%)                                               | 3 (2.9%)                                                   | 21 (3.5%)                              |
|                                                      | Missing                       | 290 (5.5%)    | 106 (4.7%)                            | 74 (10.3%)                              | 62 (3.9%)                                               | 2 (2.0%)                                                   | 46 (7.6%)                              |
| Pre-hospital GCS <sup>25</sup> , No (%)              | 14-15                         | 2,660 (50.2%) | 1,054 (46.3%)                         | 360 (50.3%)                             | 812 (50.7%)                                             | 54 (52.9%)                                                 | 379 (63.1%)                            |
|                                                      | 9-13                          | 971 (18.3%)   | 445 (19.5%)                           | 125 (17.5%)                             | 295 (18.4%)                                             | 7 (6.9%)                                                   | 99 (16.5%)                             |
|                                                      | 3-8                           | 1,378 (26.0%) | 725 (31.8%)                           | 163 (22.8%)                             | 394 (24.6%)                                             | 12 (11.8%)                                                 | 84 (14.0%)                             |
|                                                      | Missing                       | 291 (5.5%)    | 53 (2.3%)                             | 68 (9.5%)                               | 100 (6.2%)                                              | 29 (28.4%)                                                 | 39 (6.5%)                              |
| Pre-hospital arterial pressure, No (%)               | 0-50 mmHg                     | 79 (1.5%)     | 37 (1.6%)                             | 6 (0.8%)                                | 29 (1.8%)                                               | 1 (1.0%)                                                   | 6 (1.0%)                               |
|                                                      | 51-70 mmHg                    | 228 (4.3%)    | 131 (5.7%)                            | 16 (2.2%)                               | 58 (3.6%)                                               | 1 (1.0%)                                                   | 22 (3.7%)                              |
|                                                      | 71-90 mmHg                    | 689 (13.0%)   | 339 (14.9%)                           | 58 (8.1%)                               | 197 (12.3%)                                             | 6 (5.9%)                                                   | 89 (14.8%)                             |
|                                                      | >90 mmHg                      | 3,780 (71.3%) | 1,639 (72.0%)                         | 502 (70.1%)                             | 1,149 (71.8%)                                           | 59 (57.8%)                                                 | 430 (71.6%)                            |
|                                                      | missing                       | 524 (9.9%)    | 131 (5.7%)                            | 134 (18.7%)                             | 168 (10.5%)                                             | 35 (34.3%)                                                 | 54 (9.0%)                              |
| Pre-hospital hypoxia (SpO <sub>2</sub> <90%), No (%) |                               | 656 (12.4%)   | 267 (11.7%)                           | 45 (6.3%)                               | 250 (15.6%)                                             | 29 (28.4%)                                                 | 65 (10.8%)                             |
| 30-day mortality, No (%)                             |                               | 825 (15.6%)   | 399 (17.5%)                           | 96 (13.4%)                              | 247 (15.4%)                                             | 13 (12.7%)                                                 | 69 (11.5%)                             |

Younger patients were more frequently admitted to Level I TCs and older patients to Level II TCs. Paediatric traumas were chiefly centralised at Level I TCs, particularly patients aged <15 (in 91% of cases between 0-2 years, 80% between 3-8, 76% between 9 and 11 years, and 60% aged 12 years and

over). A slightly lower number of patients aged over 80 years were treated in Level I TCs (48% in Level I and 52% in Level II TCs). This observation is more clearly summarised in Figure 2.

Patients admitted to Level I TCs less frequently appeared to have comorbidities. A higher percentage of patients with GCS  $\leq 13$  were admitted to Level I or neurosurgical Level II TCs.

### Patient distribution according to three patterns of AIS values (reported in Table 2).

Table 2

Patient distribution by type of SIAT in the period 2007-2012. Patients are described according to three patterns of AIS values. The reported data are restricted to the patients for whom AIS was available (5,287 patients; 13 missing patients).

The sum of the percentages reported for all patients admitted to the Regional Trauma System. The percentages calculated in each column are given between square brackets.

Abbreviated Injury Score (AIS)<sup>20</sup>, Injury Severity Score (ISS)<sup>19</sup>, Trauma Centre (TC). Traumatic Brain Injury (TBI)

|                                                                     |                                                             | Trauma system without neurosurgical TC level II spokes (Romagna) |                        |                                        |                                    | Trauma system with neurosurgical TC level II spokes (Emilia) |                        |                                    |                                        |                                    |
|---------------------------------------------------------------------|-------------------------------------------------------------|------------------------------------------------------------------|------------------------|----------------------------------------|------------------------------------|--------------------------------------------------------------|------------------------|------------------------------------|----------------------------------------|------------------------------------|
|                                                                     |                                                             |                                                                  | TC level I (Hub)       | Non-neuro-surgical TC level II (Spoke) | Indirect access to the TC level I* |                                                              | TC level I (Hub)       | Neuro-surgical TC level II (Spoke) | Non-neuro-surgical TC level II (Spoke) | Indirect access to the TC level I* |
| Patients with ISS <sup>19</sup> >15 and full details in AIS, No (%) |                                                             | 1,472 (100%)                                                     | 1,083 (73.6%)          | 389 (26.4%)                            | 393 (36.3%)                        | 3,815 (100%)                                                 | 1,905 (49.9%)          | 1,702 (44.6%)                      | 208 (5.4%)                             | 321 (16.8%)                        |
| TBI, No (%)                                                         | AIS <sub>c</sub> ≥3 <sup>20</sup>                           | 435 (29.6%)<br>[100%]                                            | 392 (26.6%)<br>[90.1%] | 43 (2.9%)<br>[9.9%]                    | 201 (51.3%)                        | 861 (22.6%)<br>[100%]                                        | 510 (13.4%)<br>[59.2%] | 324 (8.5%)<br>[37.6%]              | 27 (0.7%)<br>[3.1%]                    | 118 (23.1%)                        |
| Multiple injury, No (%)                                             | AIS <sub>c</sub> ≥3 and AIS <sub>max</sub> ≥3 <sup>20</sup> | 490 (33.3%)<br>[100%]                                            | 391 (26.6%)<br>[79.8%] | 99 (6.7%)<br>[20.2%]                   | 124 (31.7%)                        | 1,493 (39.1%)<br>[100%]                                      | 750 (19.7%)<br>[50.2%] | 680 (17.8%)<br>[45.5%]             | 63 (1.7%)<br>[4.2%]                    | 106 (14.1%)                        |
| Extra-cranial injury, No (%)                                        | AIS max extra cranial ≥3 <sup>20</sup>                      | 547 (37.2%)<br>[100%]                                            | 300 (20.4%)<br>[54.8%] | 247 (16.8%)<br>[45.2%]                 | 68 (26.7%)                         | 1,461 (38.3%)<br>[100%]                                      | 645 (16.9%)<br>[44.1%] | 698 (18.3%)<br>[47.8%]             | 118 (3.1%)<br>[8.1%]                   | 97 (15.0%)                         |

\*: referred to the Trauma Centre

A higher proportion of all trauma system patients were admitted directly to the Level I TC of Cesena (Hub of the Romagna SIAT with no neurosurgical Level II TC) (1,083/1,472; 73.6%) compared to the Level I TCs of Emilia with neurosurgical Level II TCs (1,905/3815; 49.9%). In the SIAT of Emilia with no neurosurgical Level II TC, the proportion of all trauma system patients directly admitted to the Level I TCs (Bologna Maggiore and Parma) was a relatively similar to the percentage of direct admissions to neurosurgical Level II TCs (1,702/3815, 44.6%).

Indirect admission was more frequent at the Level I TC of Cesena (Hub of the Romagna SIAT, with no neurosurgical TC level II) (393/1083; 36.3% vs 321/1905; 16.8% at Level I TCs of Emilia). Roughly half of the patients with isolated TBI were indirectly admitted to the TC of Cesena (201/392; 51.3% vs 118/861; 23.1% at the Level I TCs of Emilia). In the SIAT of Romagna almost all indirect admissions to Level I TC of Cesena were referred from non-neurosurgical Level II TCs (346/393; 88.0%) (Table 2). Conversely, the Level I TCs in the Emilia SIAT indirectly admitted only a few patients from neurosurgical Level II TCs (39/321; 12.1%) (Table 3).

Table 3

Percentage of patients indirectly admitted to the dedicated trauma centre by type of referring hospital, in the period 2007-2012.

The percentages calculated in each column are given between square brackets.

The reported data are restricted to the patients for whom AIS was available (5,287 patients, 13 missing patients). Abbreviated Injury Score (AIS)<sup>20</sup>, Injury Severity Score (ISS)<sup>19</sup>, Trauma Centre (TC). Traumatic Brain Injury (TBI)

| Referred from                                                                 |                            | TC level I (Hub) in a SIAT without a neurosurgical TC level II (Spoke) Romagna |                                       |                          |                |           | TC level I (Hub) in a SIAT with a TC level II (Spoke) Emilia |                                       |                                   |                          |                |            |
|-------------------------------------------------------------------------------|----------------------------|--------------------------------------------------------------------------------|---------------------------------------|--------------------------|----------------|-----------|--------------------------------------------------------------|---------------------------------------|-----------------------------------|--------------------------|----------------|------------|
|                                                                               |                            | Total                                                                          | Non-neurosurgical TC level II (Spoke) | Another TC level I (Hub) | Another region | Missing   | Total                                                        | Non-neurosurgical TC level II (Spoke) | Neurosurgical TC level II (Spoke) | Another TC level I (Hub) | Another region | Missing    |
| Total ISS <sup>19</sup> >15 with secondary admission to trauma centre, No (%) |                            | 393 (100%)                                                                     | 346 (88.0%)                           | 1 (0.3%)                 | 18 (4.6%)      | 28 (7.1%) | 321 (100%)                                                   | 183 (57.0%)                           | 39 (12.1%)                        | 11 (3.4%)                | 26 (8.1%)      | 62 (19.4%) |
| TBI, No (%)                                                                   | AIS $\geq 3$ <sup>20</sup> | 201 [51.1%]                                                                    | 178 [45.3%]                           | 1 [0.3%]                 | 8 [2.0%]       | 14 [3.6%] | 118 [36.8%]                                                  | 83 [25.9%]                            | 11 [3.4%]                         | 1 [0.3%]                 | 4 [1.2%]       | 19 [5.9%]  |
| Multiple                                                                      | AIS                        | 124                                                                            | 110                                   | 0                        | 5              | 9         | 106                                                          | 63                                    | 15                                | 6                        | 7              | 15         |

| Referred from                |                                               | TC level I (Hub) in a SIAT without a neurosurgical TC level II (Spoke) Romagna |                                       |                          |                |           | TC level I (Hub) in a SIAT with a TC level II (Spoke) Emilia |                                       |                                   |                          |                |            |
|------------------------------|-----------------------------------------------|--------------------------------------------------------------------------------|---------------------------------------|--------------------------|----------------|-----------|--------------------------------------------------------------|---------------------------------------|-----------------------------------|--------------------------|----------------|------------|
|                              |                                               | Total                                                                          | Non-neurosurgical TC level II (Spoke) | Another TC level I (Hub) | Another region | Missing   | Total                                                        | Non-neurosurgical TC level II (Spoke) | Neurosurgical TC level II (Spoke) | Another TC level I (Hub) | Another region | Missing    |
| injury, No (%)               | c $\geq$ 3 and AIS max $\geq$ 3 <sup>20</sup> | [31.6 %]                                                                       | [28.0%]                               |                          | [1.3 %]        | [2.3% ]   | [33.0 %]                                                     | [19.6%]                               | [4.7%]                            | [1.9 %]                  | [2.2 %]        | [4.7 %]    |
| Extra-cranial injury, No (%) | AIS max extra cranial $\geq$ 3 <sup>20</sup>  | 68 [17.3 %]                                                                    | 58 [14.8%]                            | 0                        | 5 [1.3 %]      | 5 [1.3% ] | 97 [30.2 %]                                                  | 37 [11.5%]                            | 13 [4.0%]                         | 4 [1.2 %]                | 15 [4.7 %]     | 28 [8.7 %] |

### Standardized mortality

Observed versus expected mortality (OE) at 30 days was not statistically different among the three types of centre with a neurosurgical unit (Figure 3). However, the graphs show the progressive improvement in the mean OE value moving from neurosurgical level II TCs (Modena Baggiovara, Ferrara, Reggio Emilia hospitals) to the Level I TCs in SIATs with additional neurosurgical units (Bologna Maggiore, Parma) and, finally, to the only Level I TC in a SIAT with no neurosurgical unit (Cesena).

## **Discussion**

### Main results

The study shows that in Emilia Romagna over half of the patients with major trauma requiring ICU care were admitted to a designated Level I centre. This is testament to the adoption of good scientific practice. Only 32.2% of the patients were admitted directly to a neurosurgical level II TC.

The above phenomena is not consistent in the three Trauma Systems. While patients with isolated TBI should theoretically be admitted to Level I TCs, data have shown that they are intercepted by Level II TCs with neurosurgical facilities, even though they tend to be less severe. Furthermore, the percentage



1  
2  
3 of patients with extracranial trauma in these centres is higher than in Level I TCs, but lower than in  
4 non-neurosurgical Level II TCs, suggesting that Level I TCs act as a surrogate.

5 Fittingly, the rate of secondary referral to a Level I TC for patients with TBI, be it isolated or associated  
6 with multiple injuries, was substantially higher in the SIAT with no neurosurgical Level II TCs (35.1%)  
7 than in the SIATs with a neurosurgical facility (9.5%). The rate of centralization in the Romagna SIAT  
8 (35.1%) was similar to in the UK rates (28.3%) [30].

9  
10 The experience described in the study probably applies more to Europe than to Canadian or Australian  
11 regions, where population density is much lower, or to the USA, where exclusive trauma systems are  
12 usually headed by Level I TCs. Even in Italy the results are not easy to compare with other national  
13 data as neither the distinction between Level I and II TCs nor hub-and-spoke hierarchical systems are  
14 widely adopted and no other data sets including AIS evaluation are available. The “*National guidelines*  
15 *for defining standards of hospital care*”, recently published in Italy, do however stress the need to  
16 establish a network of functionally linked hospital facilities based on the integrated “hub and spoke”  
17 network model, which differentiates facilities by level of resource availability and expertise [31].

18  
19 Compared to the trauma model originally designed for the Emilia Romagna region, in which Level II  
20 trauma centres were entrusted with primary stabilisation of directly admitted patients, the system seems  
21 instead to have been highly influenced by the presence of other hospitals with neurosurgical units. A  
22 study conducted by the same team [32], based partly on RRTG data and partly on the ICD9-TMPM  
23 trauma severity score [28], suggested that younger and more severe patients benefited from admission  
24 to Level I compared to Level II TCs, irrespective of the presence or absence of a neurosurgical unit.

25  
26 The study does not adequately answer the question whether such patient allocation affects patient  
27 outcome since the wide confidence interval precludes any statistical significance. Nevertheless, the  
28 Observed to Expected mortality data standardised by patient severity suggest that competition among  
29 Level I and Level II TCs in the same Trauma System reduces performance in both. Mean performance  
30 values suggest that the Level I TC working without competition from a neurosurgical Level II TC  
31 performs better. Similarly, the neurosurgical level II TC competing with the Level I TC in same SIAT,  
32 seems to have the worst OE. Data seem to indicate that lower competition among centres leads to more  
33 volume in Level I TC and consequently to more expertise.

### 34 35 36 37 38 39 40 41 42 43 44 45 46 47 48 49 50 51 52 53 54 55 What does the study add?

56 The study shows that a trauma system requires capacity and ability in healthcare provision. The Trauma  
57 System, based on the principle of centralization in high-volume centres (hubs), improves prognosis, but  
58  
59  
60



1  
2  
3 also takes account of other aspects, as demographic and orographic characteristics, and local health  
4 service organization. Level II TCs are designated to provide primary patient stabilisation and surgery  
5 for haemorrhagic patients, and to appropriately limit centralization of patients with numerous  
6 comorbidities. They also have a role in night-time centralization considering, for example, that  
7 helicopters are not permitted to fly during the hours of darkness. All these aspects justify the need for  
8 spoke centres within the inclusive hub and spoke system. The availability of neurosurgery facilities  
9 remains an important variable in final patient allocation, since it can help reduce the volume of patients  
10 centralised in Level I TCs.  
11

12  
13  
14  
15  
16  
17 Development of a Trauma System must considered the specific skills that can affect patient flow over  
18 other operating factors such as the centralization protocols.  
19  
20  
21

### 22 23 Limitations

24 The study did not evaluate patient-allocation factors associated with rural versus highly urbanized  
25 areas, orography, night-time restrictions, or individual hospital resources, which can affect supply and  
26 demand. No assessment was made of local history, habitual practice prior to implementation of the  
27 Trauma System, or differences in the scope of the auditing process in each Trauma System with regard  
28 to centralization. As a result, the study does not explore in depth why the centralization rate varied in  
29 the different Trauma Systems in the same regional organization. The association between a higher  
30 number of neurosurgical centres and greater patient dispersion cannot therefore be considered a  
31 definitive causation. Furthermore, the study results probably also suffer from the lack of inclusion of  
32 patients with ISS>15 admitted to a regular ward.  
33  
34  
35  
36  
37  
38  
39

40 The study applies to the region of Emilia Romagna. Within the Italian National Health System,  
41 healthcare is autonomously planned at the regional level, thus limiting the generalizability of the  
42 results. However, since numerous Italian regions have similar orographic and healthcare characteristics  
43 to those of Emilia Romagna, and several regions have numerous neurosurgical centres, this report  
44 could be of some help to those planning to develop Trauma Systems. Finally, considering the highly-  
45 selected territory analyzed, and the spread of standards of care, the sample size is probably not yet  
46 appropriate to observe differences in performance among different subtypes of centre.  
47  
48  
49  
50  
51  
52

53 Lastly, any evaluation of patient distribution should be corroborated by an analysis linking clinical  
54 governance to an outcome. In the present study, 30-day mortality was collected and standardized, with  
55 findings suggesting that competition among centres does not help improve patient outcomes. The  
56 general limitations, and the strengths, of the use of standardized OE to compare Trauma Centre  
57  
58  
59  
60

1  
2  
3 performance has been appropriately described by Shafi [29]. In the present, highly selected setting, the  
4 similar basic standard of care among centres probably need a more extensive sample size to detect  
5 small potential differences in outcome associated with the final allocation of different trauma patients.  
6  
7 Conversely, waiting to collect several years of data before adjusting system organization would not be  
8 cost effective. Hence, by associating the data with qualitative system evaluation and expert opinion, the  
9 findings - while not statistically significant - could be sufficiently meaningful to anyone appointed to  
10 oversee clinical governance of a Trauma System.  
11  
12  
13  
14  
15  
16

### 17 Conclusions

18 The study highlights that patient centralization is *per se* largely driven by the availability of  
19 neurosurgical facilities. Consequently, this factor is crucial to the success of the Hub and Spoke system.  
20 These considerations may be helpful in the clinical governance of health systems planning to  
21 implement Trauma Systems.  
22  
23  
24  
25  
26  
27  
28  
29  
30  
31  
32  
33  
34  
35  
36  
37  
38  
39  
40  
41  
42  
43  
44  
45  
46  
47  
48  
49  
50  
51  
52  
53  
54  
55  
56  
57  
58  
59  
60

### **Ethics Approval and Consent to Participate**

The study was not submitted to the local Ethics Committee (Comitato Etico Unico di Area Vasta Romagna, IRSSST, Meldola, Italy), in accordance with its own indications (<http://www.irst.emr.it/LIstituto/ReteOncologicaAreaVastaRomagna/ComitatoEticoUnicoIRSTA VR/tabid/2363/Default.aspx>). The study was observational and retrospective and was conducted on data collected according to the indications of the Italian regulatory board (Garante per la protezione dei dati personali: <http://www.garanteprivacy.it/web/guest>). The data were fully anonymised and de-identified before analysis

### **Consent for publication**

Not applicable

### **Funding**

No funding. Data collection and analysis were done as a part of ongoing institutional activities.

### **Competing interests**

None

### **Data sharing statement**

All data are stored in the server of the Assessorato per la Sanità della Regione Emilia Romagna, Via Aldo Moro 21, 40127 Bologna-. The data will not be shared because they are the property of the Regione Emilia Romagna health system. Extra data concerning patient severity and surgical intervention are available from Rossana De Palma<sup>4</sup>, by emailing [RDePalma@Regione.Emilia-Romagna.it](mailto:RDePalma@Regione.Emilia-Romagna.it).

### **Authors contribution**

Arturo Chierogato and Rossana De Palma: idea, planning data set, data analysis, wrote the manuscript  
Annalisa Volpi<sup>2</sup>, Giovanni Gordini<sup>3</sup>, planning data set, discussion of results, wrote the manuscript  
Chiara Ventura<sup>4</sup>, planning data set, data analysis, discussion of results  
Marco Barozzi<sup>5</sup>, Maria Luisa Rita Caspani<sup>2</sup>, Andrea Fabbri<sup>6</sup>, Anna Maria Ferrari<sup>7</sup>, Enrico Ferri<sup>8</sup>,  
Aimone Giugni<sup>3</sup>, Massimiliano Marino<sup>4</sup>, Costanza Martino<sup>9</sup>, Mario Pizzamiglio<sup>10</sup>, Maurizio Ravaldini<sup>9</sup>,  
Emanuele Russo<sup>9</sup>, Laura Trabucco<sup>7</sup>, Susanna Trombetti<sup>4</sup>, planning data set, discussion of results

## Acknowledgements

We acknowledge the contribution of Amedeo Corsi, Alfio Gamberini, Giorgio Gambale, Mario Mergoni and Luigi Targa of the “Gruppo di monitoraggio Assistenza al paziente con Trauma Grave (Monitoring Group for the Care of Severe Trauma Patients)” of the Emilia Romagna Region.

## References

1. Di Bartolomeo S, Valent F, Sanson G, et al. Are the ACSCOT filters associated with outcome? Examining morbidity and mortality in a European setting. *Injury*. 2008 Sep;39(9):1001-6
2. Franco Taggi e Pietro Marturano. “Quanto ci costa il trauma?” Salute e Sicurezza Stradale: l'Onda Lunga del Trauma. C.A.F.I. Editore, Roma, 2007, pp. 565-570
3. <http://www.istat.it/it/archivio/137546> ISTAT, Automobile Club d'Italia, Anno 2013 Incidenti Stradali, novembre 2014.
4. HYPERLINK "<http://etsc.eu/8th-annual-road-safety-performance-index-pin-report/>" <http://etsc.eu/8th-annual-road-safety-performance-index-pin-report/>, ETSC (European Transport Safety Council). Annual PIN Report. Year 2014
5. MacKenzie EJ, Rivara FP, Jurkovich GJ, et al. A National Evaluation of the Effect of Trauma-Center Care on Mortality. *NEJM*. 2006 Jan;354(4):366-78
6. HYPERLINK "<http://www.amtrauma.org/?page=TraumaLevels>" <http://www.amtrauma.org/?page=TraumaLevels>
7. HYPERLINK "<http://www.gazzettaufficiale.it/eli/id/2015/06/04/15G00084/sg>" <http://www.gazzettaufficiale.it/eli/id/2015/06/04/15G00084/sg> DECRETO 2 aprile 2015, n. 70 Regolamento recante definizione degli standard qualitativi, strutturali, tecnologici e quantitativi relativi all'assistenza ospedaliera. (15G00084) (GU n.127 del 4-6-2015)
8. Chiara O, Cimbanassi S. Organized trauma care: does volume matter and do TCs save lives? *Curr Opin Crit Care*. 2003; 9(6): 510-4.
9. HYPERLINK "[http://assr.regione.emilia-romagna.it/it/aree\\_attivita/governo-clinico/professionisti-governo/reti/traumatologica/trauma-link/normativa/dgr\\_20021267.pdf/at\\_download/file/dgr\\_2002-1267.pdf](http://assr.regione.emilia-romagna.it/it/aree_attivita/governo-clinico/professionisti-governo/reti/traumatologica/trauma-link/normativa/dgr_20021267.pdf/at_download/file/dgr_2002-1267.pdf)" [http://assr.regione.emilia-romagna.it/it/aree\\_attivita/governo-clinico/professionisti-governo/reti/traumatologica/trauma-link/normativa/dgr\\_20021267.pdf/at\\_download/file/dgr\\_2002-1267.pdf](http://assr.regione.emilia-romagna.it/it/aree_attivita/governo-clinico/professionisti-governo/reti/traumatologica/trauma-link/normativa/dgr_20021267.pdf/at_download/file/dgr_2002-1267.pdf)

- 1  
2  
3 [governo/reti/traumatologica/trauma-](#)  
4 [link/normativa/dgr\\_20021267.pdf/at\\_download/file/dgr\\_2002-1267.pdf](#)  
5  
6  
7 10. HYPERLINK "http://assr.regione.emilia-romagna.it/it/aree\_attivita/governo-  
8 clinico/professionisti-governo/reti/traumatologica/trauma-link/siat"[http://assr.regione.emilia-](#)  
9 [romagna.it/it/aree\\_attivita/governo-clinico/professionisti-governo/reti/traumatologica/trauma-](#)  
10 [link/siat](#)  
11  
12  
13  
14 11. HYPERLINK "http://statistica.regione.emilia-romagna.it/"[http://statistica.regione.emilia-](#)  
15 [romagna.it](#)  
16  
17  
18 12. Chierigato A, Paci G, Portolani L, et al. Satisfaction of patients' next of kin in a 'Hub & Spoke'  
19 ICU network. *Anaesthesia* 2014; 69 (10) :1117-26.  
20  
21  
22 13. HYPERLINK "http://assr.regione.emilia-romagna.it/it/aree\_attivita/governo-  
23 clinico/professionisti-governo/reti/traumatologica/trauma-link/"[http://assr.regione.emilia-](#)  
24 [romagna.it/it/aree\\_attivita/governo-clinico/professionisti-governo/reti/traumatologica/trauma-](#)  
25 [link/normativa/dg\\_2008\\_136.pdf/at\\_download/file/dg\\_2008\\_136.pdf](#)  
26  
27  
28 14. Fabbri A, Servadei F, Marchesini G, et al. Observational approach to subjects with mild-to-  
29 moderate head injury and initial non-neurosurgical lesions. *J Neurol Neurosurg Psychiatry*  
30 2008;79(10):1180-5.  
31  
32  
33 15. Servadei F, Antonelli V, Mastrilli A, et al. Integration of image transmission into a protocol for  
34 head injury management: a preliminary report. *Br J Neurosurg* 2002; 16(1):36-42.  
35  
36  
37 16. HYPERLINK "http://assr.regione.emilia-romagna.it/it/aree\_attivita/governo-  
38 clinico/professionisti-governo/reti/traumatologica/trauma-  
39 link/normativa/DG\_2002\_2497.pdf/at\_download/file/DG\_2002\_2497.pdf"[http://assr.regione.emi-](#)  
40 [lia-romagna.it/it/aree\\_attivita/governo-clinico/professionisti-governo/reti/traumatologica/trauma-](#)  
41 [link/normativa/DG\\_2002\\_2497.pdf/at\\_download/file/DG\\_2002\\_2497.pdf](#)  
42  
43  
44  
45 17. Di Bartolomeo S, Ventura C, Marino M, et al. The counterintuitive effect of multiple injuries in  
46 severity scoring: a simple variable improves the predictive ability of NISS. *Scand J Trauma*  
47 *Resusc Emerg Med.* 2011;19:26-32.  
48  
49  
50  
51 18. HYPERLINK "http://assr.regione.emilia-romagna.it/it/aree\_attivita/governo-  
52 clinico/professionisti-governo/reti/traumatologica/trauma-  
53 link/normativa/determina\_6052008.pdf/at\_download/file/determina\_605-  
54 2008.pdf"[http://assr.regione.emilia-romagna.it/it/aree\\_attivita/governo-clinico/professionisti-](#)  
55  
56  
57  
58  
59  
60

- [governo/reti/traumatologica/trauma-link/normativa/determina\\_6052008.pdf/at\\_download/file/determina\\_605-2008.pdf](#)
19. Baker SP, O'Neill B, Haddon W Jr, et al. The injury severity score: a method for describing patients with multiple injuries and evaluating emergency care. *J Trauma* 1974;14(3):187-96.
  20. Osler T, Baker SP, Long W. A modification of the injury severity score that both improves accuracy and simplifies scoring. *J Trauma* 1997;43(6):922-5; discussion 925-6.
  21. Walder AD, Yeoman PM, Turnbull A. The abbreviated injury scale as a predictor of outcome of severe head injury. *Intensive Care Med* 1995;21(7):606-9.
  22. Lesko MM, Woodford M, White L, et al. Using Abbreviated Injury Scale (AIS) codes to classify Computed Tomography (CT) features in the Marshall System. *BMC Med Res Methodol* 2010 Aug 6;10:72.
  23. Ross SE, O'Malley KF, Stein S, et al. Abbreviated injury scaling of head injury as a prognostic tool for functional outcome. *Accid Anal Prev* 1992 Apr;24(2):181-5.
  24. Demetriades D, Kuncir E, Murray J, et al. Mortality prediction of head Abbreviated Injury Score and Glasgow Coma Scale: analysis of 7,764 head injuries. *J Am Coll Surg* 2004;199(2):216-22.
  25. Teasdale G, Jennett B. Assessment of coma and impaired consciousness. A practical scale. *Lancet*. 1974;2 (7872):81-4.
  26. Miller JD. Minor, moderate and severe head injury. *Neurosurg Rev* 1986;9(1-2):135-9.
  27. Gagne JJ, Glynn RJ, Avorn J, et al. A combined comorbidity score predicted mortality in elderly patients better than existing scores. *J Clin Epidemiol* 2011; 64(7):749-59.
  28. Di Bartolomeo S, Ventura C, Marino M, et al. Is the TPM-ICD9 revolution in trauma risk-adjustment compatible with imperfect administrative coding? *Acc Anal Prev* 2011;43(6):1955-9.
  29. Shafi S, Nathens AB, Parks J, et al. Trauma quality improvement using risk-adjusted outcomes. *J Trauma*. 2008;64(3):599-604
  30. Gabbe BJ, Biostat GD, Lecky FE, et al. The effect of an organized trauma system on mortality in major trauma involving serious head injury: a comparison of the United Kingdom and Victoria, Australia. *Ann Surg* 2011; 253(1):138-43.
  31. Sistema integrato per l'assistenza al trauma maggiore: definizione e valutazione di un modello organizzativo. Chiara O., Consiglio Superiore di Sanità, Ministero della Salute, Roma, 2004.
  32. Di Bartolomeo S, Marino M, Ventura C, et al. Evaluation of the survival benefit of Trauma-Centre care in the Italian setting. *Injury* 2014; 45: 299–303.

## Tables

### Table 1

Case material on 5,300 patients in the period 2007-2012. Data on type of referral are limited to 5,293 patients (missing data on 7 patients concerning type of admission). AIS (Abbreviated Injury Score), ISS (Injury Severity Score), Trauma Centre (TC).

### Table 2

Patient distribution by type of SIAT in the period 2007-2012. Patients are described according to three patterns of AIS values. The reported data are restricted to the patients for whom AIS was available (5,287 patients, 13 missing patients).

The sum of the percentages reported for all patients admitted to the Regional Trauma System. The percentages calculated in each column are given between square brackets.

AIS (Abbreviated Injury Score), ISS (Injury Severity Score), Trauma Centre (TC).

### Table 3

Percentage of patients indirectly admitted to the dedicated trauma centre by type of referring hospital, in the period 2007-2012.

The reported data are restricted to the patients for whom AIS was available (5,287 patients, 13 missing patients).

AIS (Abbreviated Injury Score), ISS (Injury Severity Score), Trauma Centre (TC).

## Figures

### Figure 1:

Simplified map of the Emilia Romagna region. The territory is divided into three Trauma Systems (SIATs) and the central location of the three corresponding Trauma Centres Level I (hubs) is reported. The population of each SIAT and each district referring to the Level II Trauma Centre (spoke hospital) are described.

The location and characteristics (neurosurgical versus not surgical) of the Level II Trauma Centres (spoke) are reported.

### Figure 2:

Patients distribution according to age into the Trauma Centre Level I, the Trauma Centre Level II, with or without neurosurgery. Data are expressed as absolute values (figure 2.1) as well as in percentage (figure 2.2)

### Figure 3:

Comparison of 30-day observed to expected (OE) mortality of patients affected by predominant TBI and patients affected by multiple injuries including TBI among a) the Trauma Centre Level I (Cesena) in the SIAT (Romagna) with no other neurosurgical hospitals (NSHs), b) the Trauma Centre Level I (Bologna Maggiore and Parma) in the SIATs (Emilia) with neurosurgical hospitals other than the Trauma Centre Level I, c) the Trauma Centre Level II (Ferrara, Modena Baggiovara, Reggio Emilia) in the SIATs (Emilia) with neurosurgical hospitals other than the Trauma Centre Level I.



## Appendix

### Appendix Table 1

Trauma system organization and population distribution, average data per year from 2007 to 2012. Data source <http://statistica.regione.emilia-romagna.it/>). Data are averaged over the years and thus the cumulative sums of the partial amounts do not correspond to the total.

### Appendix Table 2

Types of hospitals, \* not in Cesena

### Appendix Figure 1

Study case material

For peer review only

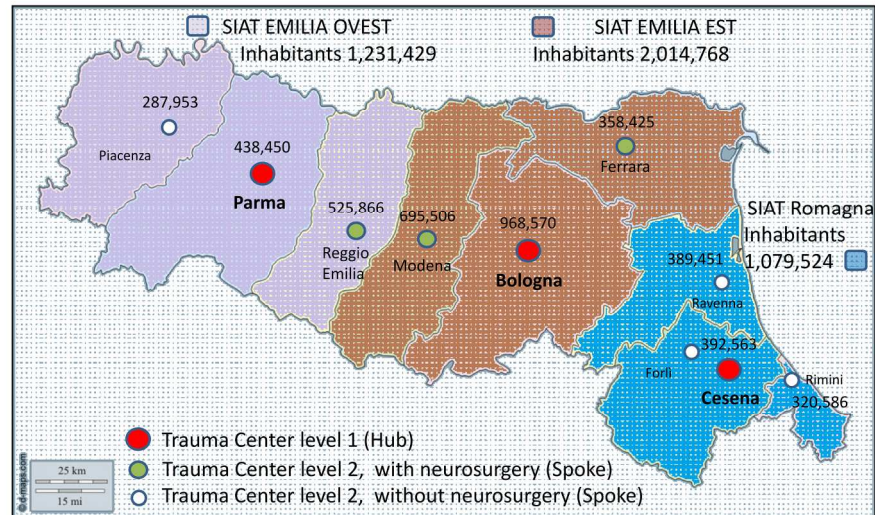

Simplified map of the Emilia Romagna region. The territory is divided into three Trauma Systems (SIATs) and the central location of the three corresponding Trauma Centres Level I (hubs) is reported. The population of each SIAT and each district referring to the Level II Trauma Centre (spoke hospital) are described.

The location and characteristics (neurosurgical versus not surgical) of the Level II Trauma Centres (spoke) are reported.

209x148mm (300 x 300 DPI)

1  
2  
3  
4  
5  
6  
7  
8  
9  
10  
11  
12  
13  
14  
15  
16  
17  
18  
19  
20  
21  
22  
23  
24  
25  
26  
27  
28  
29  
30  
31  
32  
33  
34  
35  
36  
37  
38  
39  
40  
41  
42  
43  
44  
45  
46  
47  
48  
49  
50  
51  
52  
53  
54  
55  
56  
57  
58  
59  
60

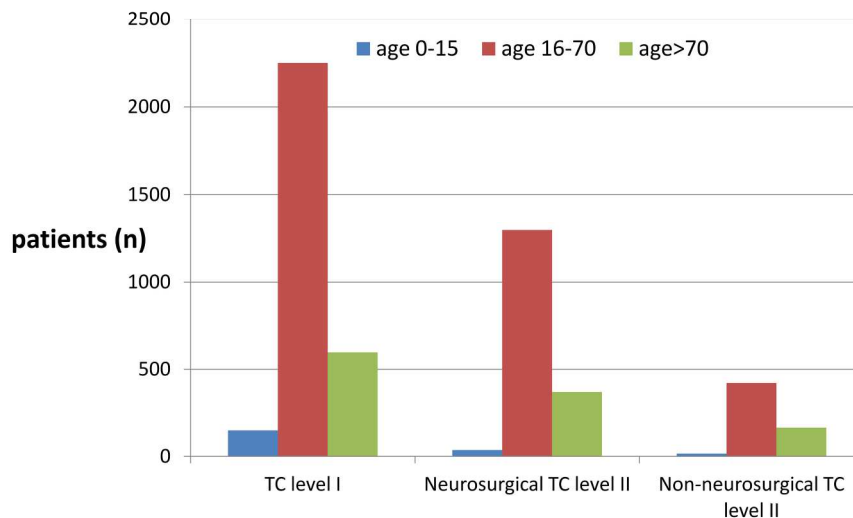

Patients distribution according to age into the Trauma Centre Level I, the Trauma Centre Level II, with or without neurosurgery. Data are expressed as absolute values (figure 2.1) as well as in percentage (figure 2.2)

209x148mm (300 x 300 DPI)

ew only

1  
2  
3  
4  
5  
6  
7  
8  
9  
10  
11  
12  
13  
14  
15  
16  
17  
18  
19  
20  
21  
22  
23  
24  
25  
26  
27  
28  
29  
30  
31  
32  
33  
34  
35  
36  
37  
38  
39  
40  
41  
42  
43  
44  
45  
46  
47  
48  
49  
50  
51  
52  
53  
54  
55  
56  
57  
58  
59  
60

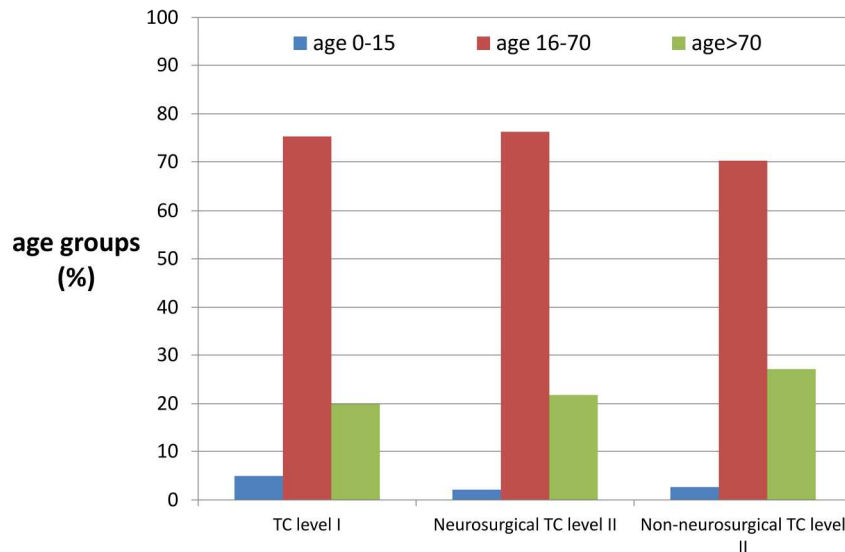

Patients distribution according to age into the Trauma Centre Level I, the Trauma Centre Level II, with or without neurosurgery. Data are expressed as absolute values (figure 2.1) as well as in percentage (figure 2.2)

209x148mm (300 x 300 DPI)

ew only

1  
2  
3  
4  
5  
6  
7  
8  
9  
10  
11  
12  
13  
14  
15  
16  
17  
18  
19  
20  
21  
22  
23  
24  
25  
26  
27  
28  
29  
30  
31  
32  
33  
34  
35  
36  
37  
38  
39  
40  
41  
42  
43  
44  
45  
46  
47  
48  
49  
50  
51  
52  
53  
54  
55  
56  
57  
58  
59  
60

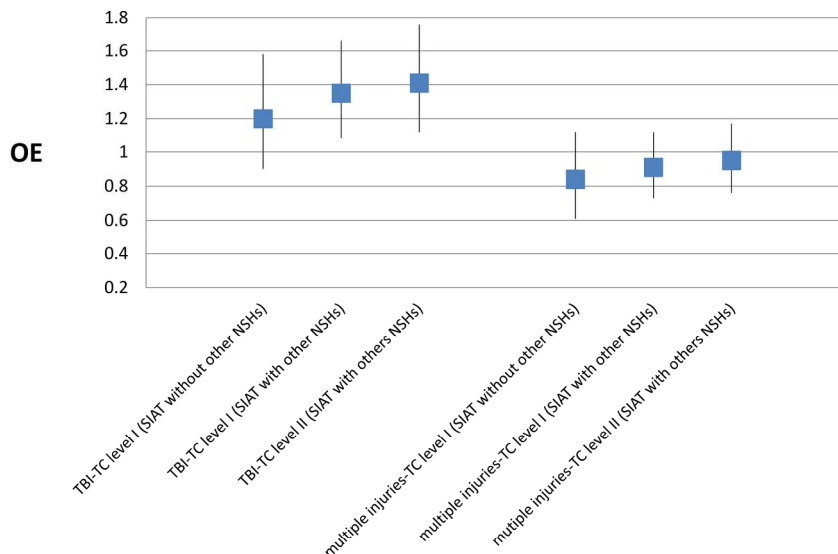

Comparison of 30-day observed to expected (OE) mortality of patients affected by predominant TBI and patients affected by multiple injuries including TBI among a) the Trauma Centre Level I (Cesena) in the SIAT (Romagna) with no other neurosurgical hospitals (NSHs), b) the Trauma Centre Level I (Bologna Maggiore and Parma) in the SIATs (Emilia) with neurosurgical hospitals other than the Trauma Centre Level I, c) the Trauma Centre Level II (Ferrara, Modena Baggiovara, Reggio Emilia) in the SIATs (Emilia) with neurosurgical hospitals other than the Trauma Centre Level I.

209x148mm (300 x 300 DPI)

For peer review only

1  
2  
3  
4  
5  
6  
7  
8  
9  
10  
11  
12  
13  
14  
15  
16  
17  
18  
19  
20  
21  
22  
23  
24  
25  
26  
27  
28  
29  
30  
31  
32  
33  
34  
35  
36  
37  
38  
39  
40  
41  
42  
43  
44  
45  
46  
47

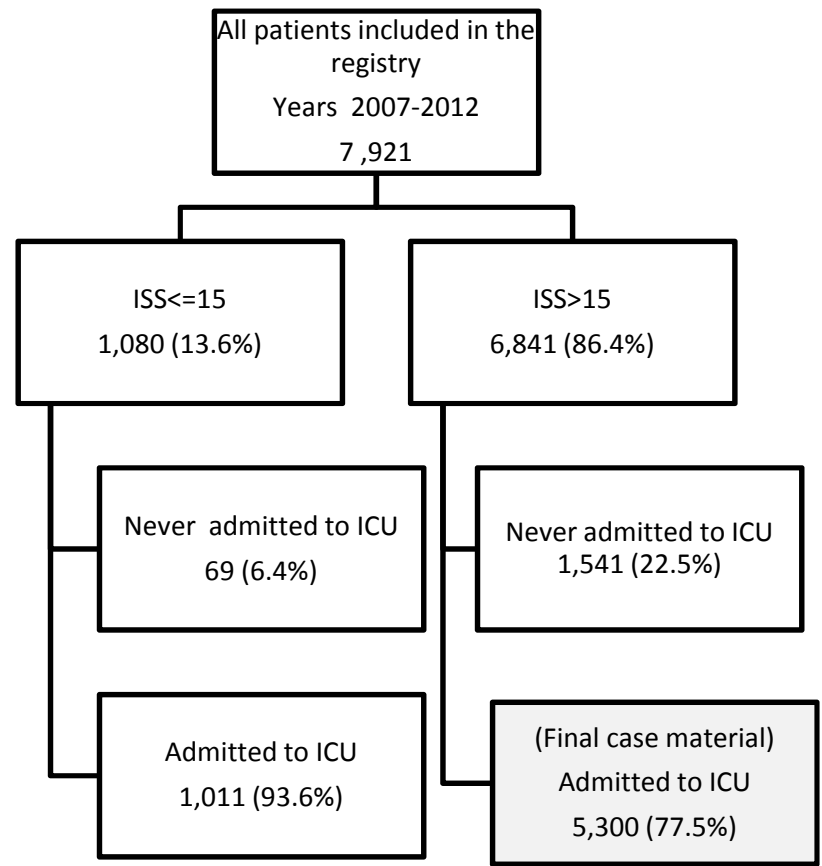

## Appendix

Table 1

Trauma system organization and population distribution, average data per year from 2007 to 2012. Data Source <http://statistica.regione.emilia-romagna.it/>. Data are averaged over the years and consequently the cumulative sums of partial does not fit with overall.

|                                       | Population       | Trauma Centers level I (Hub) | Trauma Centers level II (Spoke) |                      |
|---------------------------------------|------------------|------------------------------|---------------------------------|----------------------|
| Regione Emilia Romagna                | 4,333,088 (100%) | 1,479,519 (34.1%)            | 2,853,568 (65.9%)               |                      |
|                                       |                  |                              | With neurosurgery               | Without neurosurgery |
|                                       |                  |                              | 1,560,889 (57.3%)               | 1,163,474 (42.7%)    |
| SIAT                                  |                  |                              |                                 |                      |
| Emilia Ovest (Parma)                  |                  | 1 hospital                   | 1 hospital                      | 1 hospital           |
|                                       | 1,231,429 (100%) | 431,644 (29.2%)              | 517,368 (41.9%)                 | 284,763 (24.5%)      |
|                                       |                  | 1 hospital                   | 2 hospitals                     | 0 hospital           |
| Emilia Est (Bologna, Modena, Ferrara) | 2,014,768 (100%) | 845,046 (57.1%)              | 1,043,521 (51.7%)               | 0                    |
|                                       |                  | 1 hospital                   | 0 hospitals                     | 6 hospitals          |
| Romagna                               | 1,079,524 (100%) | 202,829 (13.7%)              | 0                               | 878,712 (75.5%)      |

Table 2, Types of hospitals, \* not in Cesena

|                                         | Trauma Centers level I (Hub)       | Trauma Centers level II (Spoke) |                      |
|-----------------------------------------|------------------------------------|---------------------------------|----------------------|
|                                         |                                    | With Neurosurgery               | Without Neurosurgery |
| Hospitals                               | 3                                  | 3                               | 7                    |
| Trauma center level                     | I                                  | II                              | III                  |
| Helicopter                              | At the hospital*, not night flight |                                 |                      |
| Emergency abdominal or thoracic surgery | 24-hour ward                       | 24-hour ward                    | 24-hour ward         |
| Cardiac surgery                         | 24-hour ward*                      |                                 |                      |
| Neurosurgery                            | 24-hour ward                       | 24-hour ward                    |                      |
| Orthopedic surgery                      | 24-hour ward*                      | 24-hour ward                    | On call              |
| Interventional radiology                | On call                            | On call                         |                      |
| Transfusion service                     | On call                            | On call                         | On call              |
| Maxillo-facial surgery                  | On call                            | On call                         | On call              |
| Trauma service                          | yes                                | No                              | No                   |
| Coordination of the SIAT Trauma System  | yes                                | No                              | No                   |

STROBE 2007 (v4) Statement—Checklist of items that should be included in reports of *cross-sectional studies*

| Section/Topic             | Item # | Recommendation                                                                                                                                                                       | Reported on page # |
|---------------------------|--------|--------------------------------------------------------------------------------------------------------------------------------------------------------------------------------------|--------------------|
| Title and abstract        | 1      | (a) Indicate the study’s design with a commonly used term in the title or the abstract                                                                                               | 1                  |
|                           |        | (b) Provide in the abstract an informative and balanced summary of what was done and what was found                                                                                  | 2                  |
| <b>Introduction</b>       |        |                                                                                                                                                                                      |                    |
| Background/rationale      | 2      | Explain the scientific background and rationale for the investigation being reported                                                                                                 | 3                  |
| Objectives                | 3      | State specific objectives, including any prespecified hypotheses                                                                                                                     | 4                  |
| <b>Methods</b>            |        |                                                                                                                                                                                      |                    |
| Study design              | 4      | Present key elements of study design early in the paper                                                                                                                              | 4                  |
| Setting                   | 5      | Describe the setting, locations, and relevant dates, including periods of recruitment, exposure, follow-up, and data collection                                                      | 4-5                |
| Participants              | 6      | (a) Give the eligibility criteria, and the sources and methods of selection of participants                                                                                          | 5                  |
| Variables                 | 7      | Clearly define all outcomes, exposures, predictors, potential confounders, and effect modifiers. Give diagnostic criteria, if applicable                                             | Not applicable     |
| Data sources/ measurement | 8*     | For each variable of interest, give sources of data and details of methods of assessment (measurement). Describe comparability of assessment methods if there is more than one group | Not applicable     |
| Bias                      | 9      | Describe any efforts to address potential sources of bias                                                                                                                            | 5                  |
| Study size                | 10     | Explain how the study size was arrived at                                                                                                                                            | Nor applicable     |
| Quantitative variables    | 11     | Explain how quantitative variables were handled in the analyses. If applicable, describe which groupings were chosen and why                                                         | 5 and 6            |
| Statistical methods       | 12     | (a) Describe all statistical methods, including those used to control for confounding                                                                                                | 5                  |
|                           |        | (b) Describe any methods used to examine subgroups and interactions                                                                                                                  | 5                  |
|                           |        | (c) Explain how missing data were addressed                                                                                                                                          | Not applicable     |
|                           |        | (d) If applicable, describe analytical methods taking account of sampling strategy                                                                                                   | Not applicable     |
|                           |        | (e) Describe any sensitivity analyses                                                                                                                                                | Not applicable     |
| <b>Results</b>            |        |                                                                                                                                                                                      | 6                  |



|                          |     |                                                                                                                                                                                                                                                                                                                                                                                                               |                                                                      |
|--------------------------|-----|---------------------------------------------------------------------------------------------------------------------------------------------------------------------------------------------------------------------------------------------------------------------------------------------------------------------------------------------------------------------------------------------------------------|----------------------------------------------------------------------|
| Participants             | 13* | (a) Report numbers of individuals at each stage of study—eg numbers potentially eligible, examined for eligibility, confirmed eligible, included in the study, completing follow-up, and analysed<br>(b) Give reasons for non-participation at each stage<br>(c) Consider use of a flow diagram                                                                                                               | 6<br><br>Appendix, figure 1                                          |
| Descriptive data         | 14* | (a) Give characteristics of study participants (eg demographic, clinical, social) and information on exposures and potential confounders<br>(b) Indicate number of participants with missing data for each variable of interest                                                                                                                                                                               |                                                                      |
| Outcome data             | 15* | Report numbers of outcome events or summary measures                                                                                                                                                                                                                                                                                                                                                          | Not applicable                                                       |
| Main results             | 16  | (a) Give unadjusted estimates and, if applicable, confounder-adjusted estimates and their precision (eg, 95% confidence interval). Make clear which confounders were adjusted for and why they were included<br>(b) Report category boundaries when continuous variables were categorized<br>(c) If relevant, consider translating estimates of relative risk into absolute risk for a meaningful time period | Page 6-11, table 1 to 3<br>Page 6-11, table 1 to 3<br>Not applicable |
| Other analyses           | 17  | Report other analyses done—eg analyses of subgroups and interactions, and sensitivity analyses                                                                                                                                                                                                                                                                                                                | Not applicable                                                       |
| <b>Discussion</b>        |     |                                                                                                                                                                                                                                                                                                                                                                                                               |                                                                      |
| Key results              | 18  | Summarise key results with reference to study objectives                                                                                                                                                                                                                                                                                                                                                      | 11                                                                   |
| Limitations              | 19  | Discuss limitations of the study, taking into account sources of potential bias or imprecision. Discuss both direction and magnitude of any potential bias                                                                                                                                                                                                                                                    |                                                                      |
| Interpretation           | 20  | Give a cautious overall interpretation of results considering objectives, limitations, multiplicity of analyses, results from similar studies, and other relevant evidence                                                                                                                                                                                                                                    | 12                                                                   |
| Generalisability         | 21  | Discuss the generalisability (external validity) of the study results                                                                                                                                                                                                                                                                                                                                         | 12                                                                   |
| <b>Other information</b> |     |                                                                                                                                                                                                                                                                                                                                                                                                               |                                                                      |
| Funding                  | 22  | Give the source of funding and the role of the funders for the present study and, if applicable, for the original study on which the present article is based                                                                                                                                                                                                                                                 | 13                                                                   |

\*Give information separately for cases and controls in case-control studies and, if applicable, for exposed and unexposed groups in cohort and cross-sectional studies.

**Note:** An Explanation and Elaboration article discusses each checklist item and gives methodological background and published examples of transparent reporting. The STROBE checklist is best used in conjunction with this article (freely available on the Web sites of PLoS Medicine at <http://www.plosmedicine.org/>, Annals of Internal Medicine at <http://www.annals.org/>, and Epidemiology at <http://www.epidem.com/>). Information on the STROBE Initiative is available at [www.strobe-statement.org](http://www.strobe-statement.org).
