# Supplementary material for: How health service delivery guides the allocation of major trauma patients in the intensive care units of the inclusive (hub and spoke) trauma system of the Emilia Romagna Region (Italy). A cross-sectional study
Source: PubMed Central journal article supplement — BMJ Open. 2017 Sep 29;7(9):e016415. doi: 10.1136/bmjopen-2017-016415 (PMC5640142; doi:10.1136/bmjopen-2017-016415), 2017-09-29
Supplement: bmjopen-2017-016415supp001.pdf [file bmjopen-2017-016415supp001.pdf]

Appendix

Table 1

Trauma system organization and population distribution, average data per year from 2007 to 2012. Data Source <http://statistica.regione.emilia-romagna.it/>). Data are averaged over the years and consequently the cumulative sums of partial does not fit with overall.

|                                       | Population       | Trauma Centers level I (Hub) | Trauma Centers level II (Spoke) |                      |
|---------------------------------------|------------------|------------------------------|---------------------------------|----------------------|
| Regione Emilia Romagna                | 4,333,088 (100%) | 1,479,519 (34.1%)            | 2,853,568 (65.9%)               |                      |
|                                       |                  |                              | With neurosurgery               | Without neurosurgery |
|                                       |                  |                              | 1,560,889 (57.3%)               | 1,163,474 (42.7%)    |
| SIAT                                  |                  |                              |                                 |                      |
| Emilia Ovest (Parma)                  |                  | 1 hospital                   | 1 hospital                      | 1 hospital           |
|                                       | 1,231,429 (100%) | 431,644 (29.2%)              | 517,368 (41.9%)                 | 284,763 (24.5%)      |
|                                       |                  | 1 hospital                   | 2 hospitals                     | 0 hospital           |
| Emilia Est (Bologna, Modena, Ferrara) | 2,014,768 (100%) | 845,046 (57.1%)              | 1,043,521 (51.7%)               | 0                    |
|                                       |                  | 1 hospital                   | 0 hospitals                     | 6 hospitals          |
| Romagna                               | 1,079,524 (100%) | 202,829 (13.7%)              | 0                               | 878,712 (75.5%)      |

Table 2, Types of hospitals, \* not in Cesena

|                                         | Trauma Centers level I (Hub)       | Trauma Centers level II (Spoke) |                      |
|-----------------------------------------|------------------------------------|---------------------------------|----------------------|
|                                         |                                    | With Neurosurgery               | Without Neurosurgery |
| Hospitals                               | 3                                  | 3                               | 7                    |
| Trauma center level                     | I                                  | II                              | III                  |
| Helicopter                              | At the hospital*, not night flight |                                 |                      |
| Emergency abdominal or thoracic surgery | 24-hour ward                       | 24-hour ward                    | 24-hour ward         |
| Cardiac surgery                         | 24-hour ward*                      |                                 |                      |
| Neurosurgery                            | 24-hour ward                       | 24-hour ward                    |                      |
| Orthopedic surgery                      | 24-hour ward*                      | 24-hour ward                    | On call              |
| Interventional radiology                | On call                            | On call                         |                      |
| Transfusion service                     | On call                            | On call                         | On call              |
| Maxillo-facial surgery                  | On call                            | On call                         | On call              |
| Trauma service                          | yes                                | No                              | No                   |
| Coordination of the SIAT Trauma System  | yes                                | No                              | No                   |
