# Supplementary figures and images for: How health service delivery guides the allocation of major trauma patients in the intensive care units of the inclusive (hub and spoke) trauma system of the Emilia Romagna Region (Italy). A cross-sectional study
Source: PubMed Central journal article supplement — BMJ Open. 2017 Sep 29;7(9):e016415. doi: 10.1136/bmjopen-2017-016415 (PMC5640142; doi:10.1136/bmjopen-2017-016415), 2017-09-29

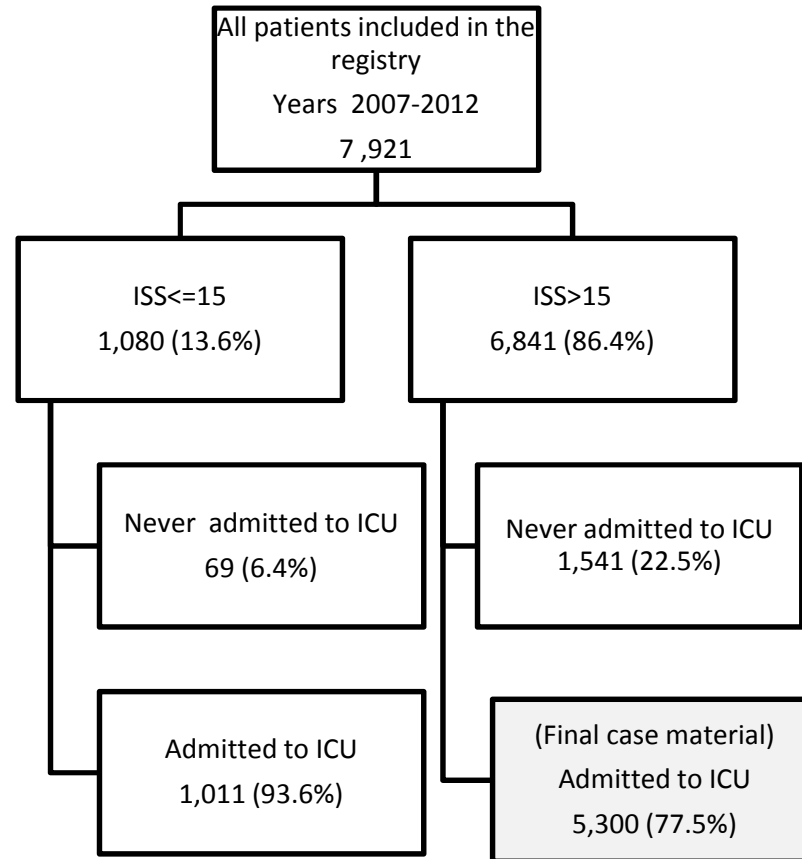

Supplement: bmjopen-2017-016415supp002.pdf [file bmjopen-2017-016415supp002.pdf]
